# Supplementary material for: Robot-assisted minimally invasive esophagectomy (RAMIE) vs. hybrid minimally invasive esophagectomy: propensity score matched short-term outcome analysis of a European high-volume center
Source: PubMed Central journal article supplement (PMC9485091; doi:10.1007/s00464-022-09254-2), 2022-05-03
Supplement: 464_2022_9254_MOESM1_ESM.pdf [file 464_2022_9254_MOESM1_ESM.pdf]

-----BEFORE MATCHING-----

. ttest preop\_age , by(psm\_robot)

Two-sample t test with equal variances

| Group    | Obs | Mean     | Std. Err. | Std. Dev. | [95% Conf. Interval] |          |
|----------|-----|----------|-----------|-----------|----------------------|----------|
| 0        | 535 | 63.36064 | .4279121  | 9.897635  | 62.52004             | 64.20123 |
| 1        | 76  | 62.92105 | .9352292  | 8.15314   | 61.05798             | 64.78412 |
| combined | 611 | 63.30596 | .3921321  | 9.692885  | 62.53586             | 64.07605 |
| diff     |     | .4395829 | 1.189043  |           | -1.895539            | 2.774705 |

diff = mean(0) - mean(1) t = 0.3697  
 Ho: diff = 0 degrees of freedom = 609

Ha: diff < 0 Pr(T < t) = 0.6441  
 Ha: diff != 0 Pr(|T| > |t|) = 0.7117  
 Ha: diff > 0 Pr(T > t) = 0.3559

. ttest preop\_height , by(psm\_robot)

Two-sample t test with equal variances

| Group    | Obs | Mean     | Std. Err. | Std. Dev. | [95% Conf. Interval] |          |
|----------|-----|----------|-----------|-----------|----------------------|----------|
| 0        | 535 | 1.769428 | .0037804  | .0874405  | 1.762002             | 1.776854 |
| 1        | 76  | 1.768289 | .0085929  | .0749113  | 1.751172             | 1.785407 |
| combined | 611 | 1.769286 | .0034762  | .0859264  | 1.76246              | 1.776113 |
| diff     |     | .0011386 | .0105418  |           | -.0195642            | .0218413 |

diff = mean(0) - mean(1) t = 0.1080  
 Ho: diff = 0 degrees of freedom = 609

Ha: diff < 0 Pr(T < t) = 0.5430  
 Ha: diff != 0 Pr(|T| > |t|) = 0.9140  
 Ha: diff > 0 Pr(T > t) = 0.4570

. ttest preop\_weight , by(psm\_robot)

Two-sample t test with equal variances

| Group    | Obs | Mean     | Std. Err. | Std. Dev. | [95% Conf. Interval] |          |
|----------|-----|----------|-----------|-----------|----------------------|----------|
| 0        | 535 | 84.62131 | .7906777  | 18.28843  | 83.06809             | 86.17453 |
| 1        | 76  | 79.30263 | 1.645011  | 14.34087  | 76.0256              | 82.57966 |
| combined | 611 | 83.95974 | .7250121  | 17.92115  | 82.53592             | 85.38356 |
| diff     |     | 5.318677 | 2.188076  |           | 1.021587             | 9.615767 |

diff = mean(0) - mean(1) t = 2.4308  
 Ho: diff = 0 degrees of freedom = 609

Ha: diff < 0 Pr(T < t) = 0.9923  
 Ha: diff != 0 Pr(|T| > |t|) = 0.0154  
 Ha: diff > 0 Pr(T > t) = 0.0077

. ttest preop\_bmi , by(psm\_robot)

Two-sample t test with equal variances

| Group    | Obs | Mean     | Std. Err. | Std. Dev. | [95% Conf. Interval] |          |
|----------|-----|----------|-----------|-----------|----------------------|----------|
| 0        | 535 | 26.90336 | .2133744  | 4.935363  | 26.48421             | 27.32252 |
| 1        | 76  | 25.28916 | .455627   | 3.972064  | 24.3815              | 26.19681 |
| combined | 611 | 26.70258 | .1963128  | 4.852541  | 26.31705             | 27.08811 |
| diff     |     | 1.614207 | .591732   |           | .4521236             | 2.77629  |

diff = mean(0) - mean(1) t = 2.7279  
 Ho: diff = 0 degrees of freedom = 609

Ha: diff < 0 Pr(T < t) = 0.9967  
 Ha: diff != 0 Pr(|T| > |t|) = 0.0066  
 Ha: diff > 0 Pr(T > t) = 0.0033

. ttest preop\_crea\_tot , by(psm\_robot)

Two-sample t test with equal variances

| Group    | Obs | Mean     | Std. Err. | Std. Dev. | [95% Conf. Interval] |          |
|----------|-----|----------|-----------|-----------|----------------------|----------|
| 0        | 535 | .8835383 | .0094569  | .2187392  | .864961              | .9021157 |
| 1        | 76  | .83075   | .0207628  | .1810063  | .7893883             | .8721117 |
| combined | 611 | .8769722 | .0086973  | .2149834  | .8598919             | .8940525 |
| diff     |     | .0527883 | .0262885  |           | .0011613             | .1044154 |

diff = mean(0) - mean(1) t = 2.0080  
Ho: diff = 0 degrees of freedom = 609

Ha: diff < 0 Ha: diff != 0 Ha: diff > 0  
Pr(T < t) = 0.9775 Pr(|T| > |t|) = 0.0451 Pr(T > t) = 0.0225

. ttest preop\_gfr\_tot , by(psm\_robot)

Two-sample t test with equal variances

| Group    | Obs | Mean     | Std. Err. | Std. Dev. | [95% Conf. Interval] |           |
|----------|-----|----------|-----------|-----------|----------------------|-----------|
| 0        | 535 | 85.59911 | .7828956  | 18.10843  | 84.06118             | 87.13705  |
| 1        | 76  | 90.04455 | 2.153981  | 18.77797  | 85.7536              | 94.3355   |
| combined | 611 | 86.15206 | .7377699  | 18.2365   | 84.70319             | 87.60094  |
| diff     |     | -4.44544 | 2.23009   |           | -8.825041            | -.0658397 |

diff = mean(0) - mean(1) t = -1.9934  
Ho: diff = 0 degrees of freedom = 609

Ha: diff < 0 Ha: diff != 0 Ha: diff > 0  
Pr(T < t) = 0.0233 Pr(|T| > |t|) = 0.0467 Pr(T > t) = 0.9767

. ttest preop\_quick\_tot , by(psm\_robot)

Two-sample t test with equal variances

| Group    | Obs | Mean      | Std. Err. | Std. Dev. | [95% Conf. Interval] |          |
|----------|-----|-----------|-----------|-----------|----------------------|----------|
| 0        | 535 | 106.8875  | .6595028  | 15.25434  | 105.592              | 108.183  |
| 1        | 76  | 107.25    | 1.423503  | 12.40981  | 104.4142             | 110.0858 |
| combined | 611 | 106.9326  | .6036613  | 14.92155  | 105.7471             | 108.1181 |
| diff     |     | -.3624953 | 1.830599  |           | -3.957548            | 3.232557 |

diff = mean(0) - mean(1) t = -0.1980  
Ho: diff = 0 degrees of freedom = 609

Ha: diff < 0 Ha: diff != 0 Ha: diff > 0  
Pr(T < t) = 0.4215 Pr(|T| > |t|) = 0.8431 Pr(T > t) = 0.5785

. ttest preop\_albumin\_tot , by(psm\_robot)

Two-sample t test with equal variances

| Group    | Obs | Mean     | Std. Err. | Std. Dev. | [95% Conf. Interval] |          |
|----------|-----|----------|-----------|-----------|----------------------|----------|
| 0        | 535 | 39.90129 | .1856283  | 4.293594  | 39.53664             | 40.26594 |
| 1        | 76  | 40.26274 | .4071059  | 3.549067  | 39.45174             | 41.07373 |
| combined | 611 | 39.94625 | .1702076  | 4.207263  | 39.61198             | 40.28051 |
| diff     |     | -.361449 | .5159623  |           | -1.37473             | .6518323 |

diff = mean(0) - mean(1) t = -0.7005  
Ho: diff = 0 degrees of freedom = 609

Ha: diff < 0 Ha: diff != 0 Ha: diff > 0  
Pr(T < t) = 0.2419 Pr(|T| > |t|) = 0.4839 Pr(T > t) = 0.7581

. ttest preop\_bilirubin\_tot , by(psm\_robot)

Two-sample t test with equal variances

| Group    | Obs | Mean     | Std. Err. | Std. Dev. | [95% Conf. Interval] |          |
|----------|-----|----------|-----------|-----------|----------------------|----------|
| 0        | 535 | .4455589 | .0099258  | .2295839  | .4260605             | .4650572 |
| 1        | 76  | .4324868 | .0222062  | .1935889  | .3882499             | .4767238 |
| combined | 611 | .4439329 | .0091154  | .225318   | .4260315             | .4618343 |
| diff     |     | .013072  | .0276382  |           | -.0412057            | .0673497 |

diff = mean(0) - mean(1) t = 0.4730  
Ho: diff = 0 degrees of freedom = 609

Ha: diff < 0 Ha: diff != 0 Ha: diff > 0  
Pr(T < t) = 0.6818 Pr(|T| > |t|) = 0.6364 Pr(T > t) = 0.3182

. ttest preop\_platelet\_tot , by(psm\_robot)

Two-sample t test with equal variances

| Group    | Obs | Mean     | Std. Err. | Std. Dev. | [95% Conf. Interval] |          |
|----------|-----|----------|-----------|-----------|----------------------|----------|
| 0        | 535 | 244.1798 | 3.630513  | 83.97401  | 237.048              | 251.3117 |
| 1        | 76  | 238.0789 | 8.69934   | 75.83909  | 220.749              | 255.4089 |
| combined | 611 | 243.421  | 3.356673  | 82.97162  | 236.8289             | 250.013  |
| diff     |     | 6.100888 | 10.17641  |           | -13.88423            | 26.08601 |

diff = mean(0) - mean(1) t = 0.5995  
Ho: diff = 0 degrees of freedom = 609

Ha: diff < 0 Ha: diff != 0 Ha: diff > 0  
Pr(T < t) = 0.7255 Pr(|T| > |t|) = 0.5491 Pr(T > t) = 0.2745

. ttest preop\_leuko\_tot , by(psm\_robot)

Two-sample t test with equal variances

| Group    | Obs | Mean     | Std. Err. | Std. Dev. | [95% Conf. Interval] |          |
|----------|-----|----------|-----------|-----------|----------------------|----------|
| 0        | 535 | 6.39515  | .1094007  | 2.530446  | 6.180241             | 6.610058 |
| 1        | 76  | 5.996974 | .2378569  | 2.073588  | 5.523138             | 6.470809 |
| combined | 611 | 6.345622 | .1003378  | 2.48019   | 6.148573             | 6.542671 |
| diff     |     | .3981758 | .3038553  |           | -.1985554            | .9949071 |

diff = mean(0) - mean(1) t = 1.3104  
 Ho: diff = 0 degrees of freedom = 609

Ha: diff < 0 Ha: diff != 0 Ha: diff > 0  
 Pr(T < t) = 0.9047 Pr(|T| > |t|) = 0.1906 Pr(T > t) = 0.0953

. ttest preop\_fev1\_tot , by(psm\_robot)

Two-sample t test with equal variances

| Group    | Obs | Mean      | Std. Err. | Std. Dev. | [95% Conf. Interval] |          |
|----------|-----|-----------|-----------|-----------|----------------------|----------|
| 0        | 535 | 3.054955  | .0342746  | .7927748  | 2.987625             | 3.122285 |
| 1        | 76  | 3.160789  | .0774698  | .6753661  | 3.006462             | 3.315117 |
| combined | 611 | 3.068119  | .0315318  | .7794165  | 3.006195             | 3.130044 |
| diff     |     | -.1058343 | .0955269  |           | -.2934364            | .0817677 |

diff = mean(0) - mean(1) t = -1.1079  
 Ho: diff = 0 degrees of freedom = 609

Ha: diff < 0 Ha: diff != 0 Ha: diff > 0  
 Pr(T < t) = 0.1342 Pr(|T| > |t|) = 0.2683 Pr(T > t) = 0.8658

. ttest preop\_vc\_tot , by(psm\_robot)

Two-sample t test with equal variances

| Group    | Obs | Mean      | Std. Err. | Std. Dev. | [95% Conf. Interval] |           |
|----------|-----|-----------|-----------|-----------|----------------------|-----------|
| 0        | 535 | 3.890011  | .0405159  | .9371364  | 3.810421             | 3.969601  |
| 1        | 76  | 4.135974  | .1009466  | .8800325  | 3.934878             | 4.33707   |
| combined | 611 | 3.920606  | .0377481  | .9330737  | 3.846474             | 3.994738  |
| diff     |     | -.2459625 | .1140399  |           | -.4699216            | -.0220033 |

diff = mean(0) - mean(1) t = -2.1568  
 Ho: diff = 0 degrees of freedom = 609

Ha: diff < 0 Ha: diff != 0 Ha: diff > 0  
 Pr(T < t) = 0.0157 Pr(|T| > |t|) = 0.0314 Pr(T > t) = 0.9843

. tabulate psm\_robot preop\_sex , chi2

| psm_robot | preop_sex |    | Total |
|-----------|-----------|----|-------|
|           | 0         | 1  |       |
| 0         | 453       | 82 | 535   |
| 1         | 61        | 15 | 76    |
| Total     | 514       | 97 | 611   |

Pearson chi2(1) = 0.9689 Pr = 0.325

. tabulate psm\_robot preop\_liver , chi2

| psm_robot | preop_liver |    | Total |
|-----------|-------------|----|-------|
|           | 0           | 1  |       |
| 0         | 505         | 30 | 535   |
| 1         | 72          | 4  | 76    |
| Total     | 577         | 34 | 611   |

Pearson chi2(1) = 0.0150 Pr = 0.902

. tabulate psm\_robot preop\_khk , chi2

| psm_robot | preop_khk |    | Total |
|-----------|-----------|----|-------|
|           | 0         | 1  |       |
| 0         | 461       | 74 | 535   |
| 1         | 69        | 7  | 76    |
| Total     | 530       | 81 | 611   |

Pearson chi2(1) = 1.2359 Pr = 0.266

. tabulate psm\_robot preop\_vhf , chi2

| psm_robot | preop_vhf |    | Total |
|-----------|-----------|----|-------|
|           | 0         | 1  |       |
| 0         | 493       | 42 | 535   |

|       |     |    |     |
|-------|-----|----|-----|
| 1     | 70  | 6  | 76  |
| Total | 563 | 48 | 611 |

Pearson chi2(1) = 0.0002 Pr = 0.989

. tabulate psm\_robot preop\_mi , chi2

| psm_robot | preop_mi |    | Total |
|-----------|----------|----|-------|
|           | 0        | 1  |       |
| 0         | 490      | 45 | 535   |
| 1         | 72       | 4  | 76    |
| Total     | 562      | 49 | 611   |

Pearson chi2(1) = 0.8940 Pr = 0.344

. tabulate psm\_robot preop\_revasc , chi2

| psm_robot | preop_revasc |    | Total |
|-----------|--------------|----|-------|
|           | 0            | 1  |       |
| 0         | 496          | 39 | 535   |
| 1         | 73           | 3  | 76    |
| Total     | 569          | 42 | 611   |

Pearson chi2(1) = 1.1613 Pr = 0.281

. tabulate psm\_robot preop\_aht , chi2

| psm_robot | preop_aht |     | Total |
|-----------|-----------|-----|-------|
|           | 0         | 1   |       |
| 0         | 229       | 306 | 535   |
| 1         | 45        | 31  | 76    |
| Total     | 274       | 337 | 611   |

Pearson chi2(1) = 7.2423 Pr = 0.007

. tabulate psm\_robot preop\_pavk , chi2

| psm_robot | preop_pavk |    | Total |
|-----------|------------|----|-------|
|           | 0          | 1  |       |
| 0         | 514        | 21 | 535   |
| 1         | 75         | 1  | 76    |
| Total     | 589        | 22 | 611   |

Pearson chi2(1) = 1.3055 Pr = 0.253

. tabulate psm\_robot preop\_diabetes , chi2

| psm_robot | preop_diabetes |    | Total |
|-----------|----------------|----|-------|
|           | 0              | 1  |       |
| 0         | 468            | 67 | 535   |
| 1         | 69             | 7  | 76    |
| Total     | 537            | 74 | 611   |

Pearson chi2(1) = 0.6861 Pr = 0.407

. tabulate psm\_robot preop\_weightloss\_bin , chi2

| psm_robot | preop_weightloss_bin |     | Total |
|-----------|----------------------|-----|-------|
|           | 0                    | 1   |       |
| 0         | 410                  | 125 | 535   |
| 1         | 59                   | 17  | 76    |
| Total     | 469                  | 142 | 611   |

Pearson chi2(1) = 0.0370 Pr = 0.847

. tabulate psm\_robot preop\_diag , chi2

| psm_robot | preop_diag |     | Total |
|-----------|------------|-----|-------|
|           | 0          | 1   |       |
| 0         | 432        | 103 | 535   |
| 1         | 58         | 18  | 76    |
| Total     | 490        | 121 | 611   |

Pearson chi2(1) = 0.8230 Pr = 0.364

. tabulate psm\_robot preop\_platelet\_bin , chi2

| psm_robot | preop_platelet_bin |    | Total |
|-----------|--------------------|----|-------|
|           | 0                  | 1  |       |
| 0         | 505                | 30 | 535   |
| 1         | 68                 | 8  | 76    |
| Total     | 573                | 38 | 611   |

Pearson chi2(1) = 2.7605 Pr = 0.097

```
. tabulate psm_robot preop_leuko_bin , chi2
```

| psm_robot | preop_leuko_bin |    | Total |
|-----------|-----------------|----|-------|
|           | 0               | 1  |       |
| 0         | 484             | 51 | 535   |
| 1         | 60              | 16 | 76    |
| Total     | 544             | 67 | 611   |

Pearson chi2(1) = 9.0455 Pr = 0.003

```
. tabulate psm_robot preop_fev1_bin , chi2
```

| psm_robot | preop_fev1_bin |     | Total |
|-----------|----------------|-----|-------|
|           | 0              | 1   |       |
| 0         | 411            | 124 | 535   |
| 1         | 64             | 12  | 76    |
| Total     | 475            | 136 | 611   |

Pearson chi2(1) = 2.0991 Pr = 0.147

```
. tabulate psm_robot preop_vc_bin , chi2
```

| psm_robot | preop_vc_bin |     | Total |
|-----------|--------------|-----|-------|
|           | 0            | 1   |       |
| 0         | 428          | 107 | 535   |
| 1         | 68           | 8   | 76    |
| Total     | 496          | 115 | 611   |

Pearson chi2(1) = 3.9090 Pr = 0.048

```
. ranksum preop_smoke , by(psm_robot)
```

Two-sample Wilcoxon rank-sum (Mann-Whitney) test

| psm_robot | obs | rank sum | expected |
|-----------|-----|----------|----------|
| 0         | 535 | 166571   | 163710   |
| 1         | 76  | 20395    | 23256    |
| combined  | 611 | 186966   | 186966   |

unadjusted variance 2073660.00

adjustment for ties -312340.28

adjusted variance 1761319.72

Ho: preop~ke(psm\_ro~t==0) = preop~ke(psm\_ro~t==1)

z = 2.156

Prob > |z| = 0.0311

```
. ranksum preop_alcohol , by(psm_robot)
```

Two-sample Wilcoxon rank-sum (Mann-Whitney) test

| psm_robot | obs | rank sum | expected |
|-----------|-----|----------|----------|
| 0         | 535 | 166451   | 163710   |
| 1         | 76  | 20515    | 23256    |
| combined  | 611 | 186966   | 186966   |

unadjusted variance 2073660.00

adjustment for ties -473888.75

adjusted variance 1599771.25

Ho: preop~l(psm\_ro~t==0) = preop~l(psm\_ro~t==1)

z = 2.167

Prob > |z| = 0.0302

```
. ranksum preop_neoadj , by(psm_robot)
```

Two-sample Wilcoxon rank-sum (Mann-Whitney) test

| psm_robot | obs | rank sum | expected |
|-----------|-----|----------|----------|
| 0         | 535 | 165254   | 163710   |
| 1         | 76  | 21712    | 23256    |
| combined  | 611 | 186966   | 186966   |

unadjusted variance 2073660.00

adjustment for ties -440384.59

adjusted variance 1633275.41

Ho: preop~j(psm\_ro~t==0) = preop~j(psm\_ro~t==1)

z = 1.208

Prob > |z| = 0.2270

```
. ranksum preop_tstage , by(psm_robot)
```

Two-sample Wilcoxon rank-sum (Mann-Whitney) test

| psm_robot | obs | rank sum | expected |
|-----------|-----|----------|----------|
| 0         | 535 | 164891.5 | 163710   |
| 1         | 76  | 22074.5  | 23256    |
| combined  | 611 | 186966   | 186966   |

unadjusted variance 2073660.00  
 adjustment for ties -1.18e+06  
 adjusted variance 893275.80

Ho: pre~tage(psm\_ro~t==0) = pre~tage(psm\_ro~t==1)  
 z = 1.250  
 Prob > |z| = 0.2113

. ranksum preop\_asa , by(psm\_robot)

Two-sample Wilcoxon rank-sum (Mann-Whitney) test

| psm_robot | obs | rank sum | expected |
|-----------|-----|----------|----------|
| 0         | 535 | 153710   | 163710   |
| 1         | 76  | 33256    | 23256    |
| combined  | 611 | 186966   | 186966   |

unadjusted variance 2073660.00  
 adjustment for ties -346127.65  
 adjusted variance 1727532.35

Ho: preop~a(psm\_ro~t==0) = preop~a(psm\_ro~t==1)  
 z = -7.608  
 Prob > |z| = 0.0000

. ranksum preop\_ecog , by(psm\_robot)

Two-sample Wilcoxon rank-sum (Mann-Whitney) test

| psm_robot | obs | rank sum | expected |
|-----------|-----|----------|----------|
| 0         | 535 | 168959   | 163710   |
| 1         | 76  | 18007    | 23256    |
| combined  | 611 | 186966   | 186966   |

unadjusted variance 2073660.00  
 adjustment for ties -463553.89  
 adjusted variance 1610106.11

Ho: preop~og(psm\_ro~t==0) = preop~og(psm\_ro~t==1)  
 z = 4.137  
 Prob > |z| = 0.0000

. ranksum preop\_copd , by(psm\_robot)

Two-sample Wilcoxon rank-sum (Mann-Whitney) test

| psm_robot | obs | rank sum | expected |
|-----------|-----|----------|----------|
| 0         | 535 | 164854.5 | 163710   |
| 1         | 76  | 22111.5  | 23256    |
| combined  | 611 | 186966   | 186966   |

unadjusted variance 2073660.00  
 adjustment for ties -1.57e+06  
 adjusted variance 501643.45

Ho: preop~d(psm\_ro~t==0) = preop~d(psm\_ro~t==1)  
 z = 1.616  
 Prob > |z| = 0.1061

.

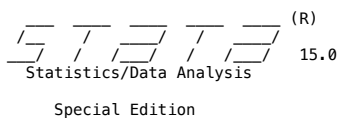

Copyright 1985-2017 StataCorp LLC  
 StataCorp  
 4905 Lakeway Drive  
 College Station, Texas 77845 USA  
 800-STATA-PC http://www.stata.com  
 979-696-4600 stata@stata.com  
 979-696-4601 (fax)

-----AFTER MATCHING-----

. ttest preop\_age , by(psm\_robot)

Two-sample t test with equal variances

-----

| Group    | Obs | Mean     | Std. Err. | Std. Dev. | [95% Conf. Interval] |          |
|----------|-----|----------|-----------|-----------|----------------------|----------|
| 0        | 71  | 62.83099 | 1.142905  | 9.630288  | 60.55153             | 65.11044 |
| 1        | 71  | 62.59155 | .9719564  | 8.18985   | 60.65304             | 64.53006 |
| combined | 142 | 62.71127 | .7475583  | 8.908185  | 61.2334              | 64.18914 |
| diff     |     | .2394366 | 1.50031   |           | -2.726757            | 3.205631 |

diff = mean(0) - mean(1) t = 0.1596  
 Ho: diff = 0 degrees of freedom = 140

Ha: diff < 0 Pr(T < t) = 0.5633  
 Ha: diff != 0 Pr(|T| > |t|) = 0.8734  
 Ha: diff > 0 Pr(T > t) = 0.4367

. ttest preop\_height , by(psm\_robot)

Two-sample t test with equal variances

| Group    | Obs | Mean      | Std. Err. | Std. Dev. | [95% Conf. Interval] |          |
|----------|-----|-----------|-----------|-----------|----------------------|----------|
| 0        | 71  | 1.758352  | .01095    | .0922664  | 1.736513             | 1.780191 |
| 1        | 71  | 1.771268  | .0087462  | .0736969  | 1.753824             | 1.788711 |
| combined | 142 | 1.76481   | .0070034  | .0834548  | 1.750965             | 1.778655 |
| diff     |     | -.0129155 | .0140142  |           | -.0406224            | .0147914 |

diff = mean(0) - mean(1) t = -0.9216  
 Ho: diff = 0 degrees of freedom = 140

Ha: diff < 0 Pr(T < t) = 0.1792  
 Ha: diff != 0 Pr(|T| > |t|) = 0.3583  
 Ha: diff > 0 Pr(T > t) = 0.8208

. ttest preop\_weight , by(psm\_robot)

Two-sample t test with equal variances

| Group    | Obs | Mean     | Std. Err. | Std. Dev. | [95% Conf. Interval] |          |
|----------|-----|----------|-----------|-----------|----------------------|----------|
| 0        | 71  | 86.10845 | 2.30304   | 19.40576  | 81.51518             | 90.70172 |
| 1        | 71  | 80.30986 | 1.605554  | 13.52864  | 77.10768             | 83.51204 |
| combined | 142 | 83.20915 | 1.419891  | 16.91996  | 80.40213             | 86.01618 |
| diff     |     | 5.798592 | 2.807454  |           | .248104              | 11.34908 |

diff = mean(0) - mean(1) t = 2.0654  
 Ho: diff = 0 degrees of freedom = 140

Ha: diff < 0 Pr(T < t) = 0.9796  
 Ha: diff != 0 Pr(|T| > |t|) = 0.0407  
 Ha: diff > 0 Pr(T > t) = 0.0204

. ttest preop\_bmi , by(psm\_robot)

Two-sample t test with equal variances

| Group    | Obs | Mean     | Std. Err. | Std. Dev. | [95% Conf. Interval] |          |
|----------|-----|----------|-----------|-----------|----------------------|----------|
| 0        | 71  | 27.74558 | .6651121  | 5.604335  | 26.41905             | 29.0721  |
| 1        | 71  | 25.55742 | .4542892  | 3.827909  | 24.65137             | 26.46347 |
| combined | 142 | 26.6515  | .411737   | 4.906412  | 25.83752             | 27.46548 |
| diff     |     | 2.188155 | .8054519  |           | .5957332             | 3.780577 |

diff = mean(0) - mean(1) t = 2.7167  
 Ho: diff = 0 degrees of freedom = 140

Ha: diff < 0 Pr(T < t) = 0.9963  
 Ha: diff != 0 Pr(|T| > |t|) = 0.0074  
 Ha: diff > 0 Pr(T > t) = 0.0037

. ttest preop\_crea\_tot , by(psm\_robot)

Two-sample t test with equal variances

| Group    | Obs | Mean     | Std. Err. | Std. Dev. | [95% Conf. Interval] |          |
|----------|-----|----------|-----------|-----------|----------------------|----------|
| 0        | 71  | .8885915 | .0236459  | .1992435  | .8414314             | .9357517 |
| 1        | 71  | .8395352 | .021503   | .1811879  | .7966487             | .8824217 |
| combined | 142 | .8640634 | .0160572  | .1913432  | .8323195             | .8958073 |
| diff     |     | .0490563 | .031961   |           | -.0141323            | .112245  |

diff = mean(0) - mean(1) t = 1.5349  
 Ho: diff = 0 degrees of freedom = 140

Ha: diff < 0 Pr(T < t) = 0.9365  
 Ha: diff != 0 Pr(|T| > |t|) = 0.1271  
 Ha: diff > 0 Pr(T > t) = 0.0635

. ttest preop\_gfr\_tot , by(psm\_robot)

Two-sample t test with equal variances

| Group    | Obs | Mean     | Std. Err. | Std. Dev. | [95% Conf. Interval] |          |
|----------|-----|----------|-----------|-----------|----------------------|----------|
| 0        | 71  | 85.09634 | 1.922689  | 16.20087  | 81.26166             | 88.93102 |
| 1        | 71  | 89.86459 | 2.274332  | 19.16386  | 85.32858             | 94.4006  |
| combined | 142 | 87.48046 | 1.497303  | 17.84243  | 84.5204              | 90.44053 |

```
-----+-----
diff |          -4.768254   2.978141                -10.6562   1.11969
-----+-----
```

```
diff = mean(0) - mean(1)                t = -1.6011
Ho: diff = 0                            degrees of freedom = 140
```

```
Ha: diff < 0                Ha: diff != 0                Ha: diff > 0
Pr(T < t) = 0.0558          Pr(|T| > |t|) = 0.1116          Pr(T > t) = 0.9442
```

```
. ttest preop_quick_tot , by(psm_robot)
```

```
Two-sample t test with equal variances
```

```
-----+-----
Group |      Obs      Mean   Std. Err.   Std. Dev.   [95% Conf. Interval]
-----+-----
0 |      71   108.0423   1.852448   15.60901   104.3477   111.7368
1 |      71   107.5352   1.201748   10.12611   105.1384   109.932
-----+-----
```

```
combined |      142   107.7887   1.100341   13.11208   105.6134   109.964
-----+-----
```

```
diff |          .5070423   2.208113                -3.858515   4.8726
-----+-----
```

```
diff = mean(0) - mean(1)                t = 0.2296
Ho: diff = 0                            degrees of freedom = 140
```

```
Ha: diff < 0                Ha: diff != 0                Ha: diff > 0
Pr(T < t) = 0.5906          Pr(|T| > |t|) = 0.8187          Pr(T > t) = 0.4094
```

```
. ttest preop_albumin_tot , by(psm_robot)
```

```
Two-sample t test with equal variances
```

```
-----+-----
Group |      Obs      Mean   Std. Err.   Std. Dev.   [95% Conf. Interval]
-----+-----
0 |      71   40.27406   .4747842   4.000602   39.32713   41.22098
1 |      71   40.29532   .4223973   3.559183   39.45288   41.13777
-----+-----
```

```
combined |      142   40.28469   .3166143   3.772895   39.65877   40.91061
-----+-----
```

```
diff |          -.0212676   .6354836                -1.277653   1.235118
-----+-----
```

```
diff = mean(0) - mean(1)                t = -0.0335
Ho: diff = 0                            degrees of freedom = 140
```

```
Ha: diff < 0                Ha: diff != 0                Ha: diff > 0
Pr(T < t) = 0.4867          Pr(|T| > |t|) = 0.9734          Pr(T > t) = 0.5133
```

```
. ttest preop_bilirubin_tot , by(psm_robot)
```

```
Two-sample t test with equal variances
```

```
-----+-----
Group |      Obs      Mean   Std. Err.   Std. Dev.   [95% Conf. Interval]
-----+-----
0 |      71   .4756338   .0342012   .2881845   .4074217   .543846
1 |      71   .439       .023104   .1946781   .3929204   .4850796
-----+-----
```

```
combined |      142   .4573169   .0206213   .2457314   .41655    .4980838
-----+-----
```

```
diff |          .0366338   .0412737                -.0449665   .1182341
-----+-----
```

```
diff = mean(0) - mean(1)                t = 0.8876
Ho: diff = 0                            degrees of freedom = 140
```

```
Ha: diff < 0                Ha: diff != 0                Ha: diff > 0
Pr(T < t) = 0.8119          Pr(|T| > |t|) = 0.3763          Pr(T > t) = 0.1881
```

```
. ttest preop_platelet_tot , by(psm_robot)
```

```
Two-sample t test with equal variances
```

```
-----+-----
Group |      Obs      Mean   Std. Err.   Std. Dev.   [95% Conf. Interval]
-----+-----
0 |      71   268.2958   14.00975   118.0482   240.3542   296.2373
1 |      71   240.1268   9.207182   77.5811   221.7636   258.4899
-----+-----
```

```
combined |      142   254.2113   8.436225   100.5292   237.5334   270.8891
-----+-----
```

```
diff |          28.16901   16.7644                -4.975111   61.31314
-----+-----
```

```
diff = mean(0) - mean(1)                t = 1.6803
Ho: diff = 0                            degrees of freedom = 140
```

```
Ha: diff < 0                Ha: diff != 0                Ha: diff > 0
Pr(T < t) = 0.9524          Pr(|T| > |t|) = 0.0951          Pr(T > t) = 0.0476
```

```
. ttest preop_leuko_tot , by(psm_robot)
```

```
Two-sample t test with equal variances
```

```
-----+-----
Group |      Obs      Mean   Std. Err.   Std. Dev.   [95% Conf. Interval]
-----+-----
0 |      71   6.717606   .3803583   3.204956   5.959005   7.476206
1 |      71   6.078732   .239684   2.019613   5.600698   6.556767
-----+-----
```

```
combined |      142   6.398169   .2256004   2.688339   5.952173   6.844165
-----+-----
```

```
diff |          .6388732   .4495785                -.2499676   1.527714
-----+-----
```

```
diff = mean(0) - mean(1)                t = 1.4210
Ho: diff = 0                            degrees of freedom = 140
```



Ha: diff < 0                      Ha: diff != 0                      Ha: diff > 0  
 Pr(T < t) = 0.9212                  Pr(|T| > |t|) = 0.1575                  Pr(T > t) = 0.0788

. ttest preop\_fev1\_tot , by(psm\_robot)

Two-sample t test with equal variances

| Group    | Obs | Mean      | Std. Err. | Std. Dev. | [95% Conf. Interval] |          |
|----------|-----|-----------|-----------|-----------|----------------------|----------|
| 0        | 71  | 3.119901  | .0870921  | .7338513  | 2.946202             | 3.293601 |
| 1        | 71  | 3.203944  | .0772152  | .6506271  | 3.049943             | 3.357945 |
| combined | 142 | 3.161923  | .0580974  | .6923107  | 3.047068             | 3.276777 |
| diff     |     | -.0840423 | .1163926  |           | -.3141566            | .1460721 |

diff = mean(0) - mean(1)                                              t = -0.7221  
 Ho: diff = 0                                                                      degrees of freedom = 140

Ha: diff < 0                      Ha: diff != 0                      Ha: diff > 0  
 Pr(T < t) = 0.2357                  Pr(|T| > |t|) = 0.4715                  Pr(T > t) = 0.7643

. ttest preop\_vc\_tot , by(psm\_robot)

Two-sample t test with equal variances

| Group    | Obs | Mean      | Std. Err. | Std. Dev. | [95% Conf. Interval] |          |
|----------|-----|-----------|-----------|-----------|----------------------|----------|
| 0        | 71  | 4.155972  | .1274106  | 1.073581  | 3.901859             | 4.410084 |
| 1        | 71  | 4.182451  | .1026649  | .8650695  | 3.977692             | 4.387209 |
| combined | 142 | 4.169211  | .0815301  | .9715431  | 4.008032             | 4.330391 |
| diff     |     | -.0264789 | .1636262  |           | -.3499766            | .2970189 |

diff = mean(0) - mean(1)                                              t = -0.1618  
 Ho: diff = 0                                                                      degrees of freedom = 140

Ha: diff < 0                      Ha: diff != 0                      Ha: diff > 0  
 Pr(T < t) = 0.4358                  Pr(|T| > |t|) = 0.8717                  Pr(T > t) = 0.5642

. tabulate psm\_robot preop\_sex , chi2

| psm_robot | preop_sex |    | Total |
|-----------|-----------|----|-------|
|           | 0         | 1  |       |
| 0         | 60        | 11 | 71    |
| 1         | 59        | 12 | 71    |
| Total     | 119       | 23 | 142   |

Pearson chi2(1) = 0.0519 Pr = 0.820

. tabulate psm\_robot preop\_liver , chi2

| psm_robot | preop_liver |   | Total |
|-----------|-------------|---|-------|
|           | 0           | 1 |       |
| 0         | 66          | 5 | 71    |
| 1         | 67          | 4 | 71    |
| Total     | 133         | 9 | 142   |

Pearson chi2(1) = 0.1186 Pr = 0.731

. tabulate psm\_robot preop\_khk , chi2

| psm_robot | preop_khk |    | Total |
|-----------|-----------|----|-------|
|           | 0         | 1  |       |
| 0         | 66        | 5  | 71    |
| 1         | 64        | 7  | 71    |
| Total     | 130       | 12 | 142   |

Pearson chi2(1) = 0.3641 Pr = 0.546

. tabulate psm\_robot preop\_vhf , chi2

| psm_robot | preop_vhf |   | Total |
|-----------|-----------|---|-------|
|           | 0         | 1 |       |
| 0         | 69        | 2 | 71    |
| 1         | 66        | 5 | 71    |
| Total     | 135       | 7 | 142   |

Pearson chi2(1) = 1.3524 Pr = 0.245

. tabulate psm\_robot preop\_mi , chi2

| psm_robot | preop_mi |   | Total |
|-----------|----------|---|-------|
|           | 0        | 1 |       |
| 0         | 68       | 3 | 71    |
| 1         | 67       | 4 | 71    |
| Total     | 135      | 7 | 142   |

Pearson chi2(1) = 0.1503 Pr = 0.698

. tabulate psm\_robot preop\_revasc , chi2

| psm_robot | preop_revasc |   | Total |
|-----------|--------------|---|-------|
|           | 0            | 1 |       |
| 0         | 69           | 2 | 71    |
| 1         | 68           | 3 | 71    |
| Total     | 137          | 5 | 142   |

Pearson chi2(1) = 0.2073 Pr = 0.649

. tabulate psm\_robot preop\_aht , chi2

| psm_robot | preop_aht |    | Total |
|-----------|-----------|----|-------|
|           | 0         | 1  |       |
| 0         | 34        | 37 | 71    |
| 1         | 41        | 30 | 71    |
| Total     | 75        | 67 | 142   |

Pearson chi2(1) = 1.3847 Pr = 0.239

. tabulate psm\_robot preop\_pavk , chi2

| psm_robot | preop_pavk |   | Total |
|-----------|------------|---|-------|
|           | 0          | 1 |       |
| 0         | 71         | 0 | 71    |
| 1         | 70         | 1 | 71    |
| Total     | 141        | 1 | 142   |

Pearson chi2(1) = 1.0071 Pr = 0.316

. tabulate psm\_robot preop\_diabetes , chi2

| psm_robot | preop_diabetes |    | Total |
|-----------|----------------|----|-------|
|           | 0              | 1  |       |
| 0         | 64             | 7  | 71    |
| 1         | 64             | 7  | 71    |
| Total     | 128            | 14 | 142   |

Pearson chi2(1) = 0.0000 Pr = 1.000

. tabulate psm\_robot preop\_weightloss\_bin , chi2

| psm_robot | preop_weightloss_bin |    | Total |
|-----------|----------------------|----|-------|
|           | 0                    | 1  |       |
| 0         | 62                   | 9  | 71    |
| 1         | 55                   | 16 | 71    |
| Total     | 117                  | 25 | 142   |

Pearson chi2(1) = 2.3788 Pr = 0.123

. tabulate psm\_robot preop\_diag , chi2

| psm_robot | preop_diag |    | Total |
|-----------|------------|----|-------|
|           | 0          | 1  |       |
| 0         | 63         | 8  | 71    |
| 1         | 57         | 14 | 71    |
| Total     | 120        | 22 | 142   |

Pearson chi2(1) = 1.9364 Pr = 0.164

. tabulate psm\_robot preop\_platelet\_bin , chi2

| psm_robot | preop_platelet_bin |    | Total |
|-----------|--------------------|----|-------|
|           | 0                  | 1  |       |
| 0         | 65                 | 6  | 71    |
| 1         | 63                 | 8  | 71    |
| Total     | 128                | 14 | 142   |

Pearson chi2(1) = 0.3170 Pr = 0.573

. tabulate psm\_robot preop\_leuko\_bin , chi2

| psm_robot | preop_leuko_bin |    | Total |
|-----------|-----------------|----|-------|
|           | 0               | 1  |       |
| 0         | 59              | 12 | 71    |
| 1         | 58              | 13 | 71    |
| Total     | 117             | 25 | 142   |

Pearson chi2(1) = 0.0485 Pr = 0.826

. tabulate psm\_robot preop\_fev1\_bin , chi2

| psm_robot | preop_fev1_bin |   | Total |
|-----------|----------------|---|-------|
|           | 0              | 1 |       |
| 0         |                |   |       |
| 1         |                |   |       |
| Total     |                |   |       |

|       |     |    |     |
|-------|-----|----|-----|
| 0     | 54  | 17 | 71  |
| 1     | 60  | 11 | 71  |
| Total | 114 | 28 | 142 |

Pearson chi2(1) = 1.6015 Pr = 0.206

. tabulate psm\_robot preop\_vc\_bin , chi2

|           |              |    |       |
|-----------|--------------|----|-------|
| psm_robot | preop_vc_bin |    | Total |
|           | 0            | 1  |       |
| 0         | 66           | 5  | 71    |
| 1         | 63           | 8  | 71    |
| Total     | 129          | 13 | 142   |

Pearson chi2(1) = 0.7621 Pr = 0.383

. ranksum preop\_smoke , by(psm\_robot)

Two-sample Wilcoxon rank-sum (Mann-Whitney) test

| psm_robot | obs | rank sum | expected |
|-----------|-----|----------|----------|
| 0         | 71  | 4821.5   | 5076.5   |
| 1         | 71  | 5331.5   | 5076.5   |
| combined  | 142 | 10153    | 10153    |

unadjusted variance 60071.92

adjustment for ties -9138.23

adjusted variance 50933.69

Ho: preop~ke(psm\_ro~t==0) = preop~ke(psm\_ro~t==1)

z = -1.130  
Prob > |z| = 0.2585

. ranksum preop\_alcohol , by(psm\_robot)

Two-sample Wilcoxon rank-sum (Mann-Whitney) test

| psm_robot | obs | rank sum | expected |
|-----------|-----|----------|----------|
| 0         | 71  | 5208.5   | 5076.5   |
| 1         | 71  | 4944.5   | 5076.5   |
| combined  | 142 | 10153    | 10153    |

unadjusted variance 60071.92

adjustment for ties -21057.92

adjusted variance 39014.00

Ho: preop~l(psm\_ro~t==0) = preop~l(psm\_ro~t==1)

z = 0.668  
Prob > |z| = 0.5039

. ranksum preop\_neoadj , by(psm\_robot)

Two-sample Wilcoxon rank-sum (Mann-Whitney) test

| psm_robot | obs | rank sum | expected |
|-----------|-----|----------|----------|
| 0         | 71  | 4514     | 5076.5   |
| 1         | 71  | 5639     | 5076.5   |
| combined  | 142 | 10153    | 10153    |

unadjusted variance 60071.92

adjustment for ties -7840.59

adjusted variance 52231.33

Ho: preop~j(psm\_ro~t==0) = preop~j(psm\_ro~t==1)

z = -2.461  
Prob > |z| = 0.0138

. ranksum preop\_tstage , by(psm\_robot)

Two-sample Wilcoxon rank-sum (Mann-Whitney) test

| psm_robot | obs | rank sum | expected |
|-----------|-----|----------|----------|
| 0         | 71  | 4680.5   | 5076.5   |
| 1         | 71  | 5472.5   | 5076.5   |
| combined  | 142 | 10153    | 10153    |

unadjusted variance 60071.92

adjustment for ties -18458.87

adjusted variance 41613.05

Ho: pre~tage(psm\_ro~t==0) = pre~tage(psm\_ro~t==1)

z = -1.941  
Prob > |z| = 0.0522

```
. ranksum preop_asa , by(psm_robot)
Two-sample Wilcoxon rank-sum (Mann-Whitney) test
```

| psm_robot | obs | rank sum | expected |
|-----------|-----|----------|----------|
| 0         | 71  | 5157.5   | 5076.5   |
| 1         | 71  | 4995.5   | 5076.5   |
| combined  | 142 | 10153    | 10153    |

```
unadjusted variance 60071.92
adjustment for ties -13961.95
adjusted variance 46109.97
Ho: preop~a(psm_ro~t==0) = preop~a(psm_ro~t==1)
z = 0.377
Prob > |z| = 0.7060
```

```
. ranksum preop_ecog , by(psm_robot)
Two-sample Wilcoxon rank-sum (Mann-Whitney) test
```

| psm_robot | obs | rank sum | expected |
|-----------|-----|----------|----------|
| 0         | 71  | 5173.5   | 5076.5   |
| 1         | 71  | 4979.5   | 5076.5   |
| combined  | 142 | 10153    | 10153    |

```
unadjusted variance 60071.92
adjustment for ties -26524.42
adjusted variance 33547.50
Ho: preop~og(psm_ro~t==0) = preop~og(psm_ro~t==1)
z = 0.530
Prob > |z| = 0.5964
```

```
. ranksum preop_copd , by(psm_robot)
Two-sample Wilcoxon rank-sum (Mann-Whitney) test
```

| psm_robot | obs | rank sum | expected |
|-----------|-----|----------|----------|
| 0         | 71  | 5041     | 5076.5   |
| 1         | 71  | 5112     | 5076.5   |
| combined  | 142 | 10153    | 10153    |

```
unadjusted variance 60071.92
adjustment for ties -53949.43
adjusted variance 6122.49
Ho: preop~d(psm_ro~t==0) = preop~d(psm_ro~t==1)
z = -0.454
Prob > |z| = 0.6500
```
