# Supplementary material for: Robot-assisted minimally invasive esophagectomy (RAMIE) vs. hybrid minimally invasive esophagectomy: propensity score matched short-term outcome analysis of a European high-volume center
Source: PubMed Central journal article supplement (PMC9485091; doi:10.1007/s00464-022-09254-2), 2022-05-03
Supplement: 464_2022_9254_MOESM2_ESM.pdf [file 464_2022_9254_MOESM2_ESM.pdf]

. logistic target\_taa preop\_ahf

|                             |               |   |        |
|-----------------------------|---------------|---|--------|
| Logistic regression         | Number of obs | = | 611    |
|                             | LR chi2(1)    | = | 11.03  |
|                             | Prob > chi2   | = | 0.0009 |
| Log likelihood = -229.75097 | Pseudo R2     | = | 0.0234 |

| target_taa | Odds Ratio | Std. Err. | z      | P> z  | [95% Conf. Interval] |
|------------|------------|-----------|--------|-------|----------------------|
| preop_ahf  | 2.331818   | .6193078  | 3.19   | 0.001 | 1.385556 3.924329    |
| _cons      | .0873016   | .0194082  | -10.97 | 0.000 | .0564663 .1349755    |

Note: \_cons estimates baseline odds.

. logistic target\_taa preop\_vhf

|                             |               |   |        |
|-----------------------------|---------------|---|--------|
| Logistic regression         | Number of obs | = | 611    |
|                             | LR chi2(1)    | = | 14.79  |
|                             | Prob > chi2   | = | 0.0001 |
| Log likelihood = -227.86757 | Pseudo R2     | = | 0.0314 |

| target_taa | Odds Ratio | Std. Err. | z      | P> z  | [95% Conf. Interval] |
|------------|------------|-----------|--------|-------|----------------------|
| preop_vhf  | 3.968254   | 1.325795  | 4.13   | 0.000 | 2.06164 7.638114     |
| _cons      | .126       | .0168449  | -15.49 | 0.000 | .0969557 .1637449    |

Note: \_cons estimates baseline odds.

. logistic target\_taa preop\_mi

|                             |               |   |        |
|-----------------------------|---------------|---|--------|
| Logistic regression         | Number of obs | = | 611    |
|                             | LR chi2(1)    | = | 3.69   |
|                             | Prob > chi2   | = | 0.0548 |
| Log likelihood = -233.41904 | Pseudo R2     | = | 0.0078 |

| target_taa | Odds Ratio | Std. Err. | z      | P> z  | [95% Conf. Interval] |
|------------|------------|-----------|--------|-------|----------------------|
| preop_mi   | 2.102941   | .7696738  | 2.03   | 0.042 | 1.026333 4.308894    |
| _cons      | .1376518   | .0178046  | -15.33 | 0.000 | .1068275 .1773702    |

Note: \_cons estimates baseline odds.

. logistic target\_taa preop\_revasc

|                             |               |   |        |
|-----------------------------|---------------|---|--------|
| Logistic regression         | Number of obs | = | 611    |
|                             | LR chi2(1)    | = | 1.35   |
|                             | Prob > chi2   | = | 0.2455 |
| Log likelihood = -234.58919 | Pseudo R2     | = | 0.0029 |

| target_taa   | Odds Ratio | Std. Err. | z      | P> z  | [95% Conf. Interval] |
|--------------|------------|-----------|--------|-------|----------------------|
| preop_revasc | 1.650375   | .6814753  | 1.21   | 0.225 | .7346884 3.707337    |
| _cons        | .1425703   | .0180859  | -15.36 | 0.000 | .1111856 .182814     |

Note: \_cons estimates baseline odds.

. logistic target\_taa preop\_pavk

|                             |               |   |        |
|-----------------------------|---------------|---|--------|
| Logistic regression         | Number of obs | = | 611    |
|                             | LR chi2(1)    | = | 0.01   |
|                             | Prob > chi2   | = | 0.9204 |
| Log likelihood = -235.25854 | Pseudo R2     | = | 0.0000 |

| target_taa | Odds Ratio | Std. Err. | z      | P> z  | [95% Conf. Interval] |
|------------|------------|-----------|--------|-------|----------------------|
| preop_pavk | 1.06579    | .6749675  | 0.10   | 0.920 | .3080376 3.687565    |
| _cons      | .1481481   | .0182091  | -15.54 | 0.000 | .1164324 .1885031    |

Note: \_cons estimates baseline odds.

. logistic target\_taa preop\_copd

|                             |               |   |        |
|-----------------------------|---------------|---|--------|
| Logistic regression         | Number of obs | = | 611    |
|                             | LR chi2(1)    | = | 1.29   |
|                             | Prob > chi2   | = | 0.2568 |
| Log likelihood = -234.62047 | Pseudo R2     | = | 0.0027 |

| target_taa | Odds Ratio | Std. Err. | z      | P> z  | [95% Conf. Interval] |
|------------|------------|-----------|--------|-------|----------------------|
| preop_copd | .638036    | .2778031  | -1.03  | 0.302 | .2717872 1.497826    |
| _cons      | .1541846   | .019139   | -15.06 | 0.000 | .1208874 .1966531    |

Note: \_cons estimates baseline odds.

. logistic target\_taa preop\_liver

|                             |               |   |        |
|-----------------------------|---------------|---|--------|
| Logistic regression         | Number of obs | = | 611    |
|                             | LR chi2(1)    | = | 0.59   |
|                             | Prob > chi2   | = | 0.4408 |
| Log likelihood = -234.96641 | Pseudo R2     | = | 0.0013 |

| target_taa  | Odds Ratio | Std. Err. | z     | P> z  | [95% Conf. Interval] |
|-------------|------------|-----------|-------|-------|----------------------|
| preop_liver | .6379457   | .3936416  | -0.73 | 0.466 | .1903503 2.13803     |

```
_cons | .1516966 .018674 -15.32 0.000 .1191769 .19309
```

Note: \_cons estimates baseline odds.

```
. logistic target_taa preop_crea_tot
```

```
Logistic regression          Number of obs = 611
                             LR chi2(1) = 6.43
                             Prob > chi2 = 0.0112
Log likelihood = -232.04856   Pseudo R2 = 0.0137
```

| target_taa     | Odds Ratio | Std. Err. | z     | P> z  | [95% Conf. Interval] |          |
|----------------|------------|-----------|-------|-------|----------------------|----------|
| preop_crea_tot | 3.706033   | 1.901321  | 2.55  | 0.011 | 1.355857             | 10.12989 |
| _cons          | .0457193   | .022274   | -6.33 | 0.000 | .0175955             | .1187949 |

Note: \_cons estimates baseline odds.

```
. logistic target_taa preop_gfr_tot
```

```
Logistic regression          Number of obs = 611
                             LR chi2(1) = 16.41
                             Prob > chi2 = 0.0001
Log likelihood = -227.05897   Pseudo R2 = 0.0349
```

| target_taa    | Odds Ratio | Std. Err. | z     | P> z  | [95% Conf. Interval] |          |
|---------------|------------|-----------|-------|-------|----------------------|----------|
| preop_gfr_tot | .9730203   | .0066902  | -3.98 | 0.000 | .9599957             | .9862216 |
| _cons         | 1.433115   | .8056801  | 0.64  | 0.522 | .4761523             | 4.313367 |

Note: \_cons estimates baseline odds.

```
. logistic target_taa preop_quick_tot
```

```
Logistic regression          Number of obs = 611
                             LR chi2(1) = 7.51
                             Prob > chi2 = 0.0061
Log likelihood = -231.50712   Pseudo R2 = 0.0160
```

| target_taa      | Odds Ratio | Std. Err. | z     | P> z  | [95% Conf. Interval] |          |
|-----------------|------------|-----------|-------|-------|----------------------|----------|
| preop_quick_tot | .9800072   | .0069898  | -2.83 | 0.005 | .9664028             | .993803  |
| _cons           | 1.243018   | .9298173  | 0.29  | 0.771 | .286914              | 5.385219 |

Note: \_cons estimates baseline odds.

```
. logistic target_taa preop_albumin_tot
```

```
Logistic regression          Number of obs = 611
                             LR chi2(1) = 0.01
                             Prob > chi2 = 0.9209
Log likelihood = -235.2586   Pseudo R2 = 0.0000
```

| target_taa        | Odds Ratio | Std. Err. | z     | P> z  | [95% Conf. Interval] |          |
|-------------------|------------|-----------|-------|-------|----------------------|----------|
| preop_albumin_tot | 1.002858   | .0288767  | 0.10  | 0.921 | .947828              | 1.061083 |
| _cons             | .1324903   | .1533705  | -1.75 | 0.081 | .0137036             | 1.280953 |

Note: \_cons estimates baseline odds.

```
. logistic target_taa preop_bilirubin_tot
```

```
Logistic regression          Number of obs = 611
                             LR chi2(1) = 0.00
                             Prob > chi2 = 0.9672
Log likelihood = -235.26268   Pseudo R2 = 0.0000
```

| target_taa          | Odds Ratio | Std. Err. | z     | P> z  | [95% Conf. Interval] |          |
|---------------------|------------|-----------|-------|-------|----------------------|----------|
| preop_bilirubin_tot | .9781445   | .5262033  | -0.04 | 0.967 | .3407925             | 2.807476 |
| _cons               | .1499588   | .0400588  | -7.10 | 0.000 | .0888359             | .2531368 |

Note: \_cons estimates baseline odds.

```
. logistic target_taa preop_platelet_bin
```

```
Logistic regression          Number of obs = 611
                             LR chi2(1) = 0.28
                             Prob > chi2 = 0.5974
Log likelihood = -235.1241   Pseudo R2 = 0.0006
```

| target_taa         | Odds Ratio | Std. Err. | z      | P> z  | [95% Conf. Interval] |          |
|--------------------|------------|-----------|--------|-------|----------------------|----------|
| preop_platelet_bin | 1.284247   | .59356    | 0.54   | 0.588 | .5190815             | 3.177323 |
| _cons              | .146       | .0182929  | -15.36 | 0.000 | .1142095             | .1866395 |

Note: \_cons estimates baseline odds.

```
. logistic target_taa preop_platelet_tot
```

```
Logistic regression          Number of obs = 611
                             LR chi2(1) = 0.09
                             Prob > chi2 = 0.7673
Log likelihood = -235.21976   Pseudo R2 = 0.0002
```

|                    | target_taa | Odds Ratio | Std. Err. | z     | P> z  | [95% Conf. Interval] |          |
|--------------------|------------|------------|-----------|-------|-------|----------------------|----------|
| preop_platelet_tot |            | .9995634   | .0014865  | -0.29 | 0.769 | .9966541             | 1.002481 |
| _cons              |            | .1650721   | .0624743  | -4.76 | 0.000 | .078618              | .3465972 |

Note: \_cons estimates baseline odds.

. logistic target\_taa preop\_leuko\_bin

```
Logistic regression               Number of obs   =       611
                                LR chi2(1)      =         0.02
                                Prob > chi2       =       0.8970
Log likelihood = -235.25514       Pseudo R2      =       0.0000
```

|                 | target_taa | Odds Ratio | Std. Err. | z      | P> z  | [95% Conf. Interval] |          |
|-----------------|------------|------------|-----------|--------|-------|----------------------|----------|
| preop_leuko_bin |            | 1.050739   | .3997616  | 0.13   | 0.896 | .4984813             | 2.214833 |
| _cons           |            | .1476793   | .0189095  | -14.94 | 0.000 | .1149021             | .1898067 |

Note: \_cons estimates baseline odds.

. logistic target\_taa preop\_leuko\_tot

```
Logistic regression               Number of obs   =       611
                                LR chi2(1)      =         3.95
                                Prob > chi2       =       0.0468
Log likelihood = -233.28696       Pseudo R2      =       0.0084
```

|                 | target_taa | Odds Ratio | Std. Err. | z     | P> z  | [95% Conf. Interval] |          |
|-----------------|------------|------------|-----------|-------|-------|----------------------|----------|
| preop_leuko_tot |            | 1.093553   | .0476595  | 2.05  | 0.040 | 1.00402              | 1.191069 |
| _cons           |            | .0826202   | .0263416  | -7.82 | 0.000 | .0442283             | .1543379 |

Note: \_cons estimates baseline odds.

. logistic target\_taa preop\_diabetes

```
Logistic regression               Number of obs   =       611
                                LR chi2(1)      =         3.60
                                Prob > chi2       =       0.0579
Log likelihood = -233.4657       Pseudo R2      =       0.0076
```

|                | target_taa | Odds Ratio | Std. Err. | z      | P> z  | [95% Conf. Interval] |          |
|----------------|------------|------------|-----------|--------|-------|----------------------|----------|
| preop_diabetes |            | 1.878972   | .5981953  | 1.98   | 0.048 | 1.006768             | 3.506804 |
| _cons          |            | .1353066   | .0180213  | -15.02 | 0.000 | .1042194             | .1756665 |

Note: \_cons estimates baseline odds.

. logistic target\_taa preop\_weight

```
Logistic regression               Number of obs   =       611
                                LR chi2(1)      =         0.84
                                Prob > chi2       =       0.3584
Log likelihood = -234.84181       Pseudo R2      =       0.0018
```

|              | target_taa | Odds Ratio | Std. Err. | z     | P> z  | [95% Conf. Interval] |          |
|--------------|------------|------------|-----------|-------|-------|----------------------|----------|
| preop_weight |            | 1.006116   | .0066377  | 0.92  | 0.355 | .9931905             | 1.019211 |
| _cons        |            | .0886003   | .0510642  | -4.21 | 0.000 | .0286319             | .2741701 |

Note: \_cons estimates baseline odds.

. logistic target\_taa preop\_height

```
Logistic regression               Number of obs   =       611
                                LR chi2(1)      =         2.58
                                Prob > chi2       =       0.1084
Log likelihood = -233.97515       Pseudo R2      =       0.0055
```

|              | target_taa | Odds Ratio | Std. Err. | z     | P> z  | [95% Conf. Interval] |          |
|--------------|------------|------------|-----------|-------|-------|----------------------|----------|
| preop_height |            | 9.688909   | 13.77749  | 1.60  | 0.110 | .5968681             | 157.2792 |
| _cons        |            | .0026341   | .0066807  | -2.34 | 0.019 | .0000183             | .3797143 |

Note: \_cons estimates baseline odds.

. logistic target\_taa preop\_bmi

```
Logistic regression               Number of obs   =       611
                                LR chi2(1)      =         0.04
                                Prob > chi2       =       0.8470
Log likelihood = -235.24492       Pseudo R2      =       0.0001
```

|           | target_taa | Odds Ratio | Std. Err. | z     | P> z  | [95% Conf. Interval] |          |
|-----------|------------|------------|-----------|-------|-------|----------------------|----------|
| preop_bmi |            | 1.004787   | .0248219  | 0.19  | 0.847 | .9572962             | 1.054634 |
| _cons     |            | .130691    | .0879041  | -3.03 | 0.002 | .0349719             | .4883965 |

Note: \_cons estimates baseline odds.

. logistic target\_taa preop\_ecog

```
Logistic regression               Number of obs   =       611
```

Log likelihood = -233.39055

|             |   |        |
|-------------|---|--------|
| LR chi2(1)  | = | 3.75   |
| Prob > chi2 | = | 0.0529 |
| Pseudo R2   | = | 0.0080 |

| target_taa | Odds Ratio | Std. Err. | z      | P> z  | [95% Conf. Interval] |
|------------|------------|-----------|--------|-------|----------------------|
| preop_ecog | 1.368788   | .2163941  | 1.99   | 0.047 | 1.00408 1.865968     |
| _cons      | .1231826   | .0196146  | -13.15 | 0.000 | .0901594 .1683015    |

Note: \_cons estimates baseline odds.

. logistic target\_taa preop\_tstage

Logistic regression

|               |   |        |
|---------------|---|--------|
| Number of obs | = | 611    |
| LR chi2(1)    | = | 0.11   |
| Prob > chi2   | = | 0.7367 |
| Pseudo R2     | = | 0.0002 |

Log likelihood = -235.207

| target_taa   | Odds Ratio | Std. Err. | z     | P> z  | [95% Conf. Interval] |
|--------------|------------|-----------|-------|-------|----------------------|
| preop_tstage | 1.076618   | .2392557  | 0.33  | 0.740 | .6964662 1.664268    |
| _cons        | .120774    | .0767448  | -3.33 | 0.001 | .0347604 .4196255    |

Note: \_cons estimates baseline odds.

. logistic target\_taa preop\_neoadj

Logistic regression

|               |   |        |
|---------------|---|--------|
| Number of obs | = | 611    |
| LR chi2(1)    | = | 1.31   |
| Prob > chi2   | = | 0.2517 |
| Pseudo R2     | = | 0.0028 |

Log likelihood = -234.60652

| target_taa   | Odds Ratio | Std. Err. | z     | P> z  | [95% Conf. Interval] |
|--------------|------------|-----------|-------|-------|----------------------|
| preop_neoadj | .8382181   | .1277898  | -1.16 | 0.247 | .6217101 1.130124    |
| _cons        | .1912633   | .0467677  | -6.76 | 0.000 | .1184393 .308864     |

Note: \_cons estimates baseline odds.

. logistic target\_taa preop\_asa

Logistic regression

|               |   |        |
|---------------|---|--------|
| Number of obs | = | 611    |
| LR chi2(1)    | = | 0.02   |
| Prob > chi2   | = | 0.8804 |
| Pseudo R2     | = | 0.0000 |

Log likelihood = -235.25221

| target_taa | Odds Ratio | Std. Err. | z     | P> z  | [95% Conf. Interval] |
|------------|------------|-----------|-------|-------|----------------------|
| preop_asa  | .9747713   | .1655762  | -0.15 | 0.880 | .6987411 1.359844    |
| _cons      | .1534527   | .0381545  | -7.54 | 0.000 | .0942609 .2498144    |

Note: \_cons estimates baseline odds.

. logistic target\_taa preop\_weightloss\_bin

Logistic regression

|               |   |        |
|---------------|---|--------|
| Number of obs | = | 611    |
| LR chi2(1)    | = | 0.47   |
| Prob > chi2   | = | 0.4947 |
| Pseudo R2     | = | 0.0010 |

Log likelihood = -235.03033

| target_taa           | Odds Ratio | Std. Err. | z      | P> z  | [95% Conf. Interval] |
|----------------------|------------|-----------|--------|-------|----------------------|
| preop_weightloss_bin | .8183422   | .2438228  | -0.67  | 0.501 | .4563749 1.467399    |
| _cons                | .1551724   | .021012   | -13.76 | 0.000 | .1190016 .2023375    |

Note: \_cons estimates baseline odds.

. logistic target\_taa preop\_fev1\_bin

Logistic regression

|               |   |        |
|---------------|---|--------|
| Number of obs | = | 611    |
| LR chi2(1)    | = | 0.03   |
| Prob > chi2   | = | 0.8651 |
| Pseudo R2     | = | 0.0001 |

Log likelihood = -235.24909

| target_taa     | Odds Ratio | Std. Err. | z      | P> z  | [95% Conf. Interval] |
|----------------|------------|-----------|--------|-------|----------------------|
| preop_fev1_bin | .951613    | .278706   | -0.17  | 0.866 | .5359973 1.6895      |
| _cons          | .1501211   | .0204464  | -13.92 | 0.000 | .1149498 .1960537    |

Note: \_cons estimates baseline odds.

. logistic target\_taa preop\_fev1\_tot

Logistic regression

|               |   |        |
|---------------|---|--------|
| Number of obs | = | 611    |
| LR chi2(1)    | = | 2.65   |
| Prob > chi2   | = | 0.1037 |
| Pseudo R2     | = | 0.0056 |

Log likelihood = -233.93936

| target_taa     | Odds Ratio | Std. Err. | z     | P> z  | [95% Conf. Interval] |
|----------------|------------|-----------|-------|-------|----------------------|
| preop_fev1_tot | .7745804   | .1226185  | -1.61 | 0.107 | .5679611 1.056366    |
| _cons          | .3204551   | .1548371  | -2.36 | 0.019 | .1243039 .8261323    |

Note: \_cons estimates baseline odds.

. logistic target\_taa preop\_vc\_bin

Logistic regression Number of obs = 611
LR chi2(1) = 2.35
Prob > chi2 = 0.1256
Pseudo R2 = 0.0050

Table with 6 columns: variable, Odds Ratio, Std. Err., z, P>|z|, [95% Conf. Interval]. Rows for preop\_vc\_bin and \_cons.

Note: \_cons estimates baseline odds.

. logistic target\_taa preop\_vc\_tot

Logistic regression Number of obs = 611
LR chi2(1) = 1.50
Prob > chi2 = 0.2209
Pseudo R2 = 0.0032

Table with 6 columns: variable, Odds Ratio, Std. Err., z, P>|z|, [95% Conf. Interval]. Rows for preop\_vc\_tot and \_cons.

Note: \_cons estimates baseline odds.

. logistic target\_taa psm\_robot

Logistic regression Number of obs = 611
LR chi2(1) = 0.09
Prob > chi2 = 0.7602
Pseudo R2 = 0.0002

Table with 6 columns: variable, Odds Ratio, Std. Err., z, P>|z|, [95% Conf. Interval]. Rows for psm\_robot and \_cons.

Note: \_cons estimates baseline odds.

. logistic target\_taa preop\_diag preop\_age preop\_sex preop\_smoke preop\_alcohol preop\_khk preop\_aht preop\_vhf preop\_mi
preop\_revasc preop\_pavk preop\_copd preop\_liver preop\_crea\_tot
> preop\_gfr\_tot preop\_quick\_tot preop\_albumin\_tot preop\_bilirubin\_tot preop\_platelet\_bin preop\_platelet\_tot preop\_leuko\_bin
preop\_leuko\_tot preop\_diabetes preop\_weight preop\_heig
> ht preop\_bmi preop\_ecog preop\_tstage preop\_neoadj preop\_asa preop\_weightloss\_bin preop\_fev1\_bin preop\_fev1\_tot
preop\_vc\_bin preop\_vc\_tot psm\_robot

Logistic regression Number of obs = 611
LR chi2(36) = 69.28
Prob > chi2 = 0.0007
Pseudo R2 = 0.1472

Large table with 6 columns: variable, Odds Ratio, Std. Err., z, P>|z|, [95% Conf. Interval]. Lists numerous variables like preop\_diag, preop\_age, etc.

Note: \_cons estimates baseline odds.

```
. logistic target_taa preop_khk preop_leuko_tot
```

```
Logistic regression          Number of obs   =      611
                             LR chi2(2)          =      12.92
                             Prob > chi2         =      0.0016
Log likelihood = -228.80571   Pseudo R2      =      0.0274
```

|  | target_taa      | Odds Ratio | Std. Err. | z     | P> z  | [95% Conf. Interval] |
|--|-----------------|------------|-----------|-------|-------|----------------------|
|  | preop_khk       | 2.52477    | .7432057  | 3.15  | 0.002 | 1.417939 4.495587    |
|  | preop_leuko_tot | 1.083835   | .0478323  | 1.82  | 0.068 | .9940257 1.181759    |
|  | _cons           | .074406    | .0241831  | -7.99 | 0.000 | .0393509 .1406894    |

Note: \_cons estimates baseline odds.

```
.
```

(R)

15.0 Copyright 1985-2017 StataCorp LLC  
StataCorp  
4905 Lakeway Drive  
College Station, Texas 77845 USA  
800-STATA-PC http://www.stata.com  
979-696-4600 stata@stata.com  
979-696-4601 (fax)

Statistics/Data Analysis  
Special Edition

```
. logistic target_pneumonia preop_diag
```

```
Logistic regression          Number of obs   =      611
                             LR chi2(1)         =      3.02
                             Prob > chi2         =      0.0823
Log likelihood = -220.03814   Pseudo R2      =      0.0068
```

|  | target_pneumonia | Odds Ratio | Std. Err. | z      | P> z  | [95% Conf. Interval] |
|--|------------------|------------|-----------|--------|-------|----------------------|
|  | preop_diag       | .5446429   | .2025124  | -1.63  | 0.102 | .2627925 1.128784    |
|  | _cons            | .147541    | .0199125  | -14.18 | 0.000 | .1132484 .1922176    |

Note: \_cons estimates baseline odds.

```
. logistic target_pneumonia preop_age
```

```
Logistic regression          Number of obs   =      611
                             LR chi2(1)         =      4.04
                             Prob > chi2         =      0.0444
Log likelihood = -219.5272   Pseudo R2      =      0.0091
```

|  | target_pneumonia | Odds Ratio | Std. Err. | z     | P> z  | [95% Conf. Interval] |
|--|------------------|------------|-----------|-------|-------|----------------------|
|  | preop_age        | 1.026848   | .0136856  | 1.99  | 0.047 | 1.000372 1.054025    |
|  | _cons            | .0243534   | .0213705  | -4.23 | 0.000 | .0043613 .1359893    |

Note: \_cons estimates baseline odds.

```
. logistic target_pneumonia preop_sex
```

```
Logistic regression          Number of obs   =      611
                             LR chi2(1)         =      0.25
                             Prob > chi2         =      0.6179
Log likelihood = -221.42319   Pseudo R2      =      0.0006
```

|  | target_pneumonia | Odds Ratio | Std. Err. | z      | P> z  | [95% Conf. Interval] |
|--|------------------|------------|-----------|--------|-------|----------------------|
|  | preop_sex        | .8379681   | .3019427  | -0.49  | 0.624 | .413539 1.698003     |
|  | _cons            | .1371681   | .0185768  | -14.67 | 0.000 | .10519 .1788677      |

Note: \_cons estimates baseline odds.

```
. logistic target_pneumonia preop_smoke
```

```
Logistic regression          Number of obs   =      611
                             LR chi2(1)         =      0.21
                             Prob > chi2         =      0.6495
Log likelihood = -221.44435   Pseudo R2      =      0.0005
```

|  | target_pneumonia | Odds Ratio | Std. Err. | z     | P> z  | [95% Conf. Interval] |
|--|------------------|------------|-----------|-------|-------|----------------------|
|  | preop_smoke      | .9232233   | .1624066  | -0.45 | 0.650 | .6539879 1.303298    |
|  | _cons            | .1442831   | .0301385  | -9.27 | 0.000 | .0958105 .2172791    |

Note: \_cons estimates baseline odds.

```
. logistic target_pneumonia preop_alcohol
```

```
Logistic regression          Number of obs   =      611
                             LR chi2(1)         =      0.73
                             Prob > chi2         =      0.3918
Log likelihood = -221.18097   Pseudo R2      =      0.0017
```





Log likelihood = -220.03128                      Prob > chi2                      =                      0.0816  
Pseudo R2                                              =                      0.0068

| target_pneumonia | Odds Ratio | Std. Err. | z      | P> z  | [95% Conf. Interval] |          |
|------------------|------------|-----------|--------|-------|----------------------|----------|
| preop_copd       | 1.652755   | .4460945  | 1.86   | 0.063 | .9737804             | 2.805149 |
| _cons            | .1250924   | .0166341  | -15.63 | 0.000 | .0963925             | .1623375 |

Note: \_cons estimates baseline odds.

. logistic target\_pneumonia preop\_liver

Logistic regression                                      Number of obs                      =                      611  
LR chi2(1)                                              =                      0.33  
Prob > chi2                                              =                      0.5672  
Log likelihood = -221.38388                      Pseudo R2                              =                      0.0007

| target_pneumonia | Odds Ratio | Std. Err. | z      | P> z  | [95% Conf. Interval] |          |
|------------------|------------|-----------|--------|-------|----------------------|----------|
| preop_liver      | .7124825   | .4403883  | -0.55  | 0.583 | .21215               | 2.392794 |
| _cons            | .1358268   | .0174268  | -15.56 | 0.000 | .105627              | .1746609 |

Note: \_cons estimates baseline odds.

. logistic target\_pneumonia preop\_crea\_tot

Logistic regression                                      Number of obs                      =                      611  
LR chi2(1)                                              =                      0.21  
Prob > chi2                                              =                      0.6487  
Log likelihood = -221.44385                      Pseudo R2                              =                      0.0005

| target_pneumonia | Odds Ratio | Std. Err. | z     | P> z  | [95% Conf. Interval] |          |
|------------------|------------|-----------|-------|-------|----------------------|----------|
| preop_crea_tot   | 1.29684    | .7314277  | 0.46  | 0.645 | .4293409             | 3.917153 |
| _cons            | .1062236   | .0547478  | -4.35 | 0.000 | .0386822             | .2916967 |

Note: \_cons estimates baseline odds.

. logistic target\_pneumonia preop\_gfr\_tot

Logistic regression                                      Number of obs                      =                      611  
LR chi2(1)                                              =                      1.39  
Prob > chi2                                              =                      0.2381  
Log likelihood = -220.85163                      Pseudo R2                              =                      0.0031

| target_pneumonia | Odds Ratio | Std. Err. | z     | P> z  | [95% Conf. Interval] |          |
|------------------|------------|-----------|-------|-------|----------------------|----------|
| preop_gfr_tot    | .991886    | .0068627  | -1.18 | 0.239 | .9785262             | 1.005428 |
| _cons            | .2672543   | .1590871  | -2.22 | 0.027 | .0832213             | .8582523 |

Note: \_cons estimates baseline odds.

. logistic target\_pneumonia preop\_quick\_tot

Logistic regression                                      Number of obs                      =                      611  
LR chi2(1)                                              =                      0.23  
Prob > chi2                                              =                      0.6305  
Log likelihood = -221.43188                      Pseudo R2                              =                      0.0005

| target_pneumonia | Odds Ratio | Std. Err. | z     | P> z  | [95% Conf. Interval] |          |
|------------------|------------|-----------|-------|-------|----------------------|----------|
| preop_quick_tot  | .9960469   | .0081143  | -0.49 | 0.627 | .9802695             | 1.012078 |
| _cons            | .203753    | .178199   | -1.82 | 0.069 | .0366993             | 1.13123  |

Note: \_cons estimates baseline odds.

. logistic target\_pneumonia preop\_albumin\_tot

Logistic regression                                      Number of obs                      =                      611  
LR chi2(1)                                              =                      0.04  
Prob > chi2                                              =                      0.8378  
Log likelihood = -221.52664                      Pseudo R2                              =                      0.0001

| target_pneumonia  | Odds Ratio | Std. Err. | z     | P> z  | [95% Conf. Interval] |          |
|-------------------|------------|-----------|-------|-------|----------------------|----------|
| preop_albumin_tot | 1.006164   | .0302955  | 0.20  | 0.838 | .9485044             | 1.067329 |
| _cons             | .1044771   | .1266027  | -1.86 | 0.062 | .0097175             | 1.123275 |

Note: \_cons estimates baseline odds.

. logistic target\_pneumonia preop\_bilirubin\_tot

Logistic regression                                      Number of obs                      =                      611  
LR chi2(1)                                              =                      2.30  
Prob > chi2                                              =                      0.1292  
Log likelihood = -220.39684                      Pseudo R2                              =                      0.0052

| target_pneumonia    | Odds Ratio | Std. Err. | z     | P> z  | [95% Conf. Interval] |          |
|---------------------|------------|-----------|-------|-------|----------------------|----------|
| preop_bilirubin_tot | 2.14787    | 1.040168  | 1.58  | 0.114 | .8313596             | 5.549156 |
| _cons               | .094019    | .0246498  | -9.02 | 0.000 | .0562404             | .1571748 |

Note: \_cons estimates baseline odds.

```
. logistic target_pneumonia preop_platelet_bin
```

```
Logistic regression      Number of obs   =      611
                        LR chi2(1)              =      2.01
                        Prob > chi2             =      0.1560
Log likelihood = -220.54129      Pseudo R2       =      0.0045
```

|                    | Odds Ratio | Std. Err. | z      | P> z  | [95% Conf. Interval] |
|--------------------|------------|-----------|--------|-------|----------------------|
| preop_platelet_bin | .3992063   | .294454   | -1.24  | 0.213 | .0940486 1.694503    |
| _cons              | .139165    | .0177531  | -15.46 | 0.000 | .1083786 .1786968    |

Note: \_cons estimates baseline odds.

```
. logistic target_pneumonia preop_platelet_tot
```

```
Logistic regression      Number of obs   =      611
                        LR chi2(1)              =      0.44
                        Prob > chi2             =      0.5080
Log likelihood = -221.32852      Pseudo R2       =      0.0010
```

|                    | Odds Ratio | Std. Err. | z     | P> z  | [95% Conf. Interval] |
|--------------------|------------|-----------|-------|-------|----------------------|
| preop_platelet_tot | .998962    | .0015957  | -0.65 | 0.516 | .9958394 1.002095    |
| _cons              | .171526    | .068717   | -4.40 | 0.000 | .0782204 .3761314    |

Note: \_cons estimates baseline odds.

```
. logistic target_pneumonia preop_leuko_bin
```

```
Logistic regression      Number of obs   =      611
                        LR chi2(1)              =      1.51
                        Prob > chi2             =      0.2194
Log likelihood = -220.7935      Pseudo R2       =      0.0034
```

|                 | Odds Ratio | Std. Err. | z      | P> z  | [95% Conf. Interval] |
|-----------------|------------|-----------|--------|-------|----------------------|
| preop_leuko_bin | .5741455   | .2772301  | -1.15  | 0.250 | .2228504 1.479212    |
| _cons           | .1404612   | .0183256  | -15.04 | 0.000 | .1087683 .1813889    |

Note: \_cons estimates baseline odds.

```
. logistic target_pneumonia preop_leuko_tot
```

```
Logistic regression      Number of obs   =      611
                        LR chi2(1)              =      1.47
                        Prob > chi2             =      0.2257
Log likelihood = -220.81366      Pseudo R2       =      0.0033
```

|                 | Odds Ratio | Std. Err. | z     | P> z  | [95% Conf. Interval] |
|-----------------|------------|-----------|-------|-------|----------------------|
| preop_leuko_tot | 1.059728   | .0494569  | 1.24  | 0.214 | .9670952 1.161233    |
| _cons           | .0916921   | .0306199  | -7.15 | 0.000 | .0476519 .1764347    |

Note: \_cons estimates baseline odds.

```
. logistic target_pneumonia preop_diabetes
```

```
Logistic regression      Number of obs   =      611
                        LR chi2(1)              =      0.72
                        Prob > chi2             =      0.3946
Log likelihood = -221.18525      Pseudo R2       =      0.0016
```

|                | Odds Ratio | Std. Err. | z      | P> z  | [95% Conf. Interval] |
|----------------|------------|-----------|--------|-------|----------------------|
| preop_diabetes | 1.362477   | .4822407  | 0.87   | 0.382 | .6808502 2.726509    |
| _cons          | .1281513   | .0174278  | -15.11 | 0.000 | .0981668 .1672942    |

Note: \_cons estimates baseline odds.

```
. logistic target_pneumonia preop_weight
```

```
Logistic regression      Number of obs   =      611
                        LR chi2(1)              =      2.99
                        Prob > chi2             =      0.0836
Log likelihood = -220.05063      Pseudo R2       =      0.0068
```

|              | Odds Ratio | Std. Err. | z     | P> z  | [95% Conf. Interval] |
|--------------|------------|-----------|-------|-------|----------------------|
| preop_weight | 1.011881   | .0068336  | 1.75  | 0.080 | .9985753 1.025363    |
| _cons        | .048704    | .0292329  | -5.03 | 0.000 | .0150197 .1579315    |

Note: \_cons estimates baseline odds.

```
. logistic target_pneumonia preop_height
```

```
Logistic regression      Number of obs   =      611
                        LR chi2(1)              =      1.46
                        Prob > chi2             =      0.2265
Log likelihood = -220.81618      Pseudo R2       =      0.0033
```

|              | Odds Ratio | Std. Err. | z     | P> z  | [95% Conf. Interval] |
|--------------|------------|-----------|-------|-------|----------------------|
| preop_height | .1713387   | .2498772  | -1.21 | 0.226 | .0098283 2.986977    |

\_cons | 3.002383 7.712809 0.43 0.669 .0195352 461.4387

Note: \_cons estimates baseline odds.

. logistic target\_pneumonia preop\_bmi

Logistic regression

|               |   |        |
|---------------|---|--------|
| Number of obs | = | 611    |
| LR chi2(1)    | = | 6.52   |
| Prob > chi2   | = | 0.0107 |
| Pseudo R2     | = | 0.0147 |

Log likelihood = -218.28724

| target_pneumonia | Odds Ratio | Std. Err. | z     | P> z  | [95% Conf. Interval] |
|------------------|------------|-----------|-------|-------|----------------------|
| preop_bmi        | 1.064806   | .0257114  | 2.60  | 0.009 | 1.015587 1.116411    |
| _cons            | .0240884   | .0164869  | -5.44 | 0.000 | .0062982 .0921296    |

Note: \_cons estimates baseline odds.

. logistic target\_pneumonia preop\_ecog

Logistic regression

|               |   |        |
|---------------|---|--------|
| Number of obs | = | 611    |
| LR chi2(1)    | = | 1.25   |
| Prob > chi2   | = | 0.2643 |
| Pseudo R2     | = | 0.0028 |

Log likelihood = -220.92464

| target_pneumonia | Odds Ratio | Std. Err. | z      | P> z  | [95% Conf. Interval] |
|------------------|------------|-----------|--------|-------|----------------------|
| preop_ecog       | 1.212052   | .2048519  | 1.14   | 0.255 | .8702774 1.688049    |
| _cons            | .1196294   | .0194543  | -13.06 | 0.000 | .086979 .1645362     |

Note: \_cons estimates baseline odds.

. logistic target\_pneumonia preop\_tstage

Logistic regression

|               |   |        |
|---------------|---|--------|
| Number of obs | = | 611    |
| LR chi2(1)    | = | 2.87   |
| Prob > chi2   | = | 0.0904 |
| Pseudo R2     | = | 0.0065 |

Log likelihood = -220.11381

| target_pneumonia | Odds Ratio | Std. Err. | z     | P> z  | [95% Conf. Interval] |
|------------------|------------|-----------|-------|-------|----------------------|
| preop_tstage     | 1.550225   | .4354009  | 1.56  | 0.119 | .8939719 2.688226    |
| _cons            | .0384915   | .0315138  | -3.98 | 0.000 | .0077351 .1915411    |

Note: \_cons estimates baseline odds.

. logistic target\_pneumonia preop\_neoadj

Logistic regression

|               |   |        |
|---------------|---|--------|
| Number of obs | = | 611    |
| LR chi2(1)    | = | 0.67   |
| Prob > chi2   | = | 0.4118 |
| Pseudo R2     | = | 0.0015 |

Log likelihood = -221.21078

| target_pneumonia | Odds Ratio | Std. Err. | z     | P> z  | [95% Conf. Interval] |
|------------------|------------|-----------|-------|-------|----------------------|
| preop_neoadj     | .8762583   | .1398851  | -0.83 | 0.408 | .6408364 1.198166    |
| _cons            | .1616324   | .0417216  | -7.06 | 0.000 | .0974566 .2680686    |

Note: \_cons estimates baseline odds.

. logistic target\_pneumonia preop\_asa

Logistic regression

|               |   |        |
|---------------|---|--------|
| Number of obs | = | 611    |
| LR chi2(1)    | = | 1.47   |
| Prob > chi2   | = | 0.2254 |
| Pseudo R2     | = | 0.0033 |

Log likelihood = -220.81265

| target_pneumonia | Odds Ratio | Std. Err. | z     | P> z  | [95% Conf. Interval] |
|------------------|------------|-----------|-------|-------|----------------------|
| preop_asa        | .8069558   | .1429649  | -1.21 | 0.226 | .5702247 1.141967    |
| _cons            | .1745973   | .0433115  | -7.04 | 0.000 | .1073703 .2839167    |

Note: \_cons estimates baseline odds.

. logistic target\_pneumonia preop\_weightloss\_bin

Logistic regression

|               |   |        |
|---------------|---|--------|
| Number of obs | = | 611    |
| LR chi2(1)    | = | 1.29   |
| Prob > chi2   | = | 0.2554 |
| Pseudo R2     | = | 0.0029 |

Log likelihood = -220.90085

| target_pneumonia     | Odds Ratio | Std. Err. | z      | P> z  | [95% Conf. Interval] |
|----------------------|------------|-----------|--------|-------|----------------------|
| preop_weightloss_bin | .7003022   | .2259093  | -1.10  | 0.269 | .3721327 1.317872    |
| _cons                | .1439024   | .0200372  | -13.92 | 0.000 | .1095332 .1890561    |

Note: \_cons estimates baseline odds.

. logistic target\_pneumonia preop\_fev1\_bin

Logistic regression

|               |   |        |
|---------------|---|--------|
| Number of obs | = | 611    |
| LR chi2(1)    | = | 11.64  |
| Prob > chi2   | = | 0.0006 |
| Pseudo R2     | = | 0.0263 |

Log likelihood = -215.72677

| target_pneumonia | Odds Ratio | Std. Err. | z      | P> z  | [95% Conf. Interval] |
|------------------|------------|-----------|--------|-------|----------------------|
| preop_fev1_bin   | 2.539562   | .6720058  | 3.52   | 0.000 | 1.511883 4.265789    |
| _cons            | .1020882   | .0161569  | -14.42 | 0.000 | .0748619 .1392162    |

Note: \_cons estimates baseline odds.

. logistic target\_pneumonia preop\_fev1\_tot

```
Logistic regression          Number of obs   =      611
                             LR chi2(1)          =      9.35
                             Prob > chi2         =     0.0022
Log likelihood = -216.87408   Pseudo R2       =     0.0211
```

| target_pneumonia | Odds Ratio | Std. Err. | z     | P> z  | [95% Conf. Interval] |
|------------------|------------|-----------|-------|-------|----------------------|
| preop_fev1_tot   | .6009886   | .1023609  | -2.99 | 0.003 | .4304165 .8391578    |
| _cons            | .6009521   | .3007956  | -1.02 | 0.309 | .2253131 1.602852    |

Note: \_cons estimates baseline odds.

. logistic target\_pneumonia preop\_vc\_bin

```
Logistic regression          Number of obs   =      611
                             LR chi2(1)          =     6.59
                             Prob > chi2         =     0.0102
Log likelihood = -218.25076   Pseudo R2       =     0.0149
```

| target_pneumonia | Odds Ratio | Std. Err. | z      | P> z  | [95% Conf. Interval] |
|------------------|------------|-----------|--------|-------|----------------------|
| preop_vc_bin     | 2.110108   | .5910162  | 2.67   | 0.008 | 1.21869 3.653559     |
| _cons            | .1121076   | .0167195  | -14.67 | 0.000 | .0836929 .1501695    |

Note: \_cons estimates baseline odds.

. logistic target\_pneumonia preop\_vc\_tot

```
Logistic regression          Number of obs   =      611
                             LR chi2(1)          =     6.95
                             Prob > chi2         =     0.0084
Log likelihood = -218.07505   Pseudo R2       =     0.0157
```

| target_pneumonia | Odds Ratio | Std. Err. | z     | P> z  | [95% Conf. Interval] |
|------------------|------------|-----------|-------|-------|----------------------|
| preop_vc_tot     | .6976682   | .0964002  | -2.61 | 0.009 | .5321503 .9146683    |
| _cons            | .5252087   | .2757488  | -1.23 | 0.220 | .1876843 1.469724    |

Note: \_cons estimates baseline odds.

. logistic target\_pneumonia psm\_robot

```
Logistic regression          Number of obs   =      611
                             LR chi2(1)          =     1.39
                             Prob > chi2         =     0.2386
Log likelihood = -220.85331   Pseudo R2       =     0.0031
```

| target_pneumonia | Odds Ratio | Std. Err. | z      | P> z  | [95% Conf. Interval] |
|------------------|------------|-----------|--------|-------|----------------------|
| psm_robot        | .6090909   | .2711899  | -1.11  | 0.265 | .2545046 1.457702    |
| _cons            | .1407249   | .0185008  | -14.92 | 0.000 | .1087591 .182086     |

Note: \_cons estimates baseline odds.

```
. logistic target_pneumonia preop_diag preop_age preop_sex preop_smoke preop_alcohol preop_khk preop_aht preop_vhf preop_mi
preop_revasc preop_pavk preop_copd preop_liver preop_cr
> ea_tot preop_gfr_tot preop_quick_tot preop_bilirubin_tot preop_platelet_bin preop_platelet_tot
preop_leuko_bin preop_leuko_tot preop_diabetes preop_weight preo
> p_height preop_bmi preop_ecog preop_tstage preop_neoadj preop_asa preop_weightloss_bin preop_fev1_bin preop_fev1_tot
preop_vc_bin preop_vc_tot psm_robot
```

```
Logistic regression          Number of obs   =      611
                             LR chi2(36)         =    56.63
                             Prob > chi2         =     0.0156
Log likelihood = -193.23406   Pseudo R2       =     0.1278
```

| target_pneumonia  | Odds Ratio | Std. Err. | z     | P> z  | [95% Conf. Interval] |
|-------------------|------------|-----------|-------|-------|----------------------|
| preop_diag        | .6326231   | .2773847  | -1.04 | 0.296 | .267868 1.494064     |
| preop_age         | 1.030439   | .0259448  | 1.19  | 0.234 | .9808226 1.082566    |
| preop_sex         | .6766491   | .3989017  | -0.66 | 0.508 | .2130879 2.148663    |
| preop_smoke       | .9652471   | .2068341  | -0.17 | 0.869 | .6342233 1.469044    |
| preop_alcohol     | .8430321   | .1401301  | -1.03 | 0.304 | .6086338 1.167702    |
| preop_khk         | 2.545186   | 1.280836  | 1.86  | 0.063 | .9492094 6.8246      |
| preop_aht         | 1.000203   | .3008694  | 0.00  | 0.999 | .5546763 1.803585    |
| preop_vhf         | .8666103   | .4616931  | -0.27 | 0.788 | .3050281 2.462112    |
| preop_mi          | 1.155817   | .6826678  | 0.25  | 0.806 | .3631936 3.678238    |
| preop_revasc      | .3334004   | .228813   | -1.60 | 0.109 | .0868532 1.279813    |
| preop_pavk        | 1.517129   | .9486582  | 0.67  | 0.505 | .4454181 5.167463    |
| preop_copd        | 1.29609    | .4190533  | 0.80  | 0.422 | .6877394 2.442568    |
| preop_liver       | .6629907   | .4446334  | -0.61 | 0.540 | .1780946 2.468108    |
| preop_crea_tot    | .8040614   | 1.081115  | -0.16 | 0.871 | .0576489 11.2147     |
| preop_gfr_tot     | 1.00374    | .0177446  | 0.21  | 0.833 | .9695566 1.039128    |
| preop_quick_tot   | 1.004471   | .0100242  | 0.45  | 0.655 | .9850148 1.024312    |
| preop_albumin_tot | 1.032309   | .0379173  | 0.87  | 0.387 | .9606043 1.109366    |



```

Logistic regression          Number of obs   =      611
                             LR chi2(1)           =       1.56
                             Prob > chi2          =      0.2114
Log likelihood = -212.58662   Pseudo R2      =      0.0037

```

| target_ai     | Odds Ratio | Std. Err. | z      | P> z  | [95% Conf. Interval] |          |
|---------------|------------|-----------|--------|-------|----------------------|----------|
| preop_alcohol | .8287765   | .1294038  | -1.20  | 0.229 | .6102843             | 1.125492 |
| _cons         | .1393335   | .0211287  | -13.00 | 0.000 | .103509              | .1875567 |

Note: \_cons estimates baseline odds.

```
. logistic target_ai preop_khk
```

```

Logistic regression          Number of obs   =      611
                             LR chi2(1)           =       3.19
                             Prob > chi2          =      0.0739
Log likelihood = -211.76995   Pseudo R2      =      0.0075

```

| target_ai | Odds Ratio | Std. Err. | z      | P> z  | [95% Conf. Interval] |          |
|-----------|------------|-----------|--------|-------|----------------------|----------|
| preop_khk | 1.841901   | .6024263  | 1.87   | 0.062 | .9702096             | 3.496768 |
| _cons     | .1134454   | .0162901  | -15.16 | 0.000 | .0856168             | .1503193 |

Note: \_cons estimates baseline odds.

```
. logistic target_ai preop_aht
```

```

Logistic regression          Number of obs   =      611
                             LR chi2(1)           =      14.90
                             Prob > chi2          =      0.0001
Log likelihood = -205.91597   Pseudo R2      =      0.0349

```

| target_ai | Odds Ratio | Std. Err. | z      | P> z  | [95% Conf. Interval] |          |
|-----------|------------|-----------|--------|-------|----------------------|----------|
| preop_aht | 2.942105   | .8782838  | 3.61   | 0.000 | 1.638912             | 5.281542 |
| _cons     | .0620155   | .0159774  | -10.79 | 0.000 | .0374283             | .1027543 |

Note: \_cons estimates baseline odds.

```
. logistic target_ai preop_vhf
```

```

Logistic regression          Number of obs   =      611
                             LR chi2(1)           =       0.58
                             Prob > chi2          =      0.4450
Log likelihood = -213.07569   Pseudo R2      =      0.0014

```

| target_ai | Odds Ratio | Std. Err. | z      | P> z  | [95% Conf. Interval] |          |
|-----------|------------|-----------|--------|-------|----------------------|----------|
| preop_vhf | 1.405038   | .6053625  | 0.79   | 0.430 | .6038747             | 3.269109 |
| _cons     | .1215139   | .0164764  | -15.54 | 0.000 | .0931556             | .1585051 |

Note: \_cons estimates baseline odds.

```
. logistic target_ai preop_mi
```

```

Logistic regression          Number of obs   =      611
                             LR chi2(1)           =       0.50
                             Prob > chi2          =      0.4790
Log likelihood = -213.11678   Pseudo R2      =      0.0012

```

| target_ai | Odds Ratio | Std. Err. | z      | P> z  | [95% Conf. Interval] |          |
|-----------|------------|-----------|--------|-------|----------------------|----------|
| preop_mi  | 1.368853   | .588855   | 0.73   | 0.465 | .5890952             | 3.180737 |
| _cons     | .1217565   | .0165111  | -15.53 | 0.000 | .0933389             | .158826  |

Note: \_cons estimates baseline odds.

```
. logistic target_ai preop_revasc
```

```

Logistic regression          Number of obs   =      611
                             LR chi2(1)           =       2.45
                             Prob > chi2          =      0.1174
Log likelihood = -212.14159   Pseudo R2      =      0.0057

```

| target_ai    | Odds Ratio | Std. Err. | z      | P> z  | [95% Conf. Interval] |          |
|--------------|------------|-----------|--------|-------|----------------------|----------|
| preop_revasc | 1.996078   | .8303376  | 1.66   | 0.097 | .8832649             | 4.510911 |
| _cons        | .1178782   | .01609    | -15.66 | 0.000 | .0902085             | .154035  |

Note: \_cons estimates baseline odds.

```
. logistic target_ai preop_pavk
```

```

Logistic regression          Number of obs   =      611
                             LR chi2(1)           =       2.50
                             Prob > chi2          =      0.1140
Log likelihood = -212.11821   Pseudo R2      =      0.0059

```

| target_ai  | Odds Ratio | Std. Err. | z      | P> z  | [95% Conf. Interval] |          |
|------------|------------|-----------|--------|-------|----------------------|----------|
| preop_pavk | 2.455649   | 1.291489  | 1.71   | 0.088 | .875987              | 6.883906 |
| _cons      | .1197719   | .015968   | -15.92 | 0.000 | .0922301             | .1555381 |

Note: \_cons estimates baseline odds.

. logistic target\_ai preop\_copd

```

Logistic regression          Number of obs   =      611
                             LR chi2(1)         =      2.66
                             Prob > chi2        =     0.1028
Log likelihood = -212.03659   Pseudo R2      =     0.0062

```

| target_ai  | Odds Ratio | Std. Err. | z      | P> z  | [95% Conf. Interval] |          |
|------------|------------|-----------|--------|-------|----------------------|----------|
| preop_copd | .4550399   | .2592654  | -1.38  | 0.167 | .1489585             | 1.39006  |
| _cons      | .1324684   | .0174371  | -15.36 | 0.000 | .102345              | .1714581 |

Note: \_cons estimates baseline odds.

. logistic target\_ai preop\_liver

```

Logistic regression          Number of obs   =      611
                             LR chi2(1)         =      0.21
                             Prob > chi2        =     0.6500
Log likelihood = -213.26442   Pseudo R2      =     0.0005

```

| target_ai   | Odds Ratio | Std. Err. | z      | P> z  | [95% Conf. Interval] |          |
|-------------|------------|-----------|--------|-------|----------------------|----------|
| preop_liver | .7622829   | .4717103  | -0.44  | 0.661 | .2266636             | 2.563601 |
| _cons       | .1269531   | .0167163  | -15.67 | 0.000 | .0980761             | .1643325 |

Note: \_cons estimates baseline odds.

. logistic target\_ai preop\_crea\_tot

```

Logistic regression          Number of obs   =      611
                             LR chi2(1)         =      1.92
                             Prob > chi2        =     0.1662
Log likelihood = -212.40876   Pseudo R2      =     0.0045

```

| target_ai      | Odds Ratio | Std. Err. | z     | P> z  | [95% Conf. Interval] |          |
|----------------|------------|-----------|-------|-------|----------------------|----------|
| preop_crea_tot | 2.167454   | 1.176318  | 1.43  | 0.154 | .748147              | 6.279325 |
| _cons          | .0628475   | .0319337  | -5.45 | 0.000 | .0232157             | .1701355 |

Note: \_cons estimates baseline odds.

. logistic target\_ai preop\_gfr\_tot

```

Logistic regression          Number of obs   =      611
                             LR chi2(1)         =      1.95
                             Prob > chi2        =     0.1621
Log likelihood = -212.38997   Pseudo R2      =     0.0046

```

| target_ai     | Odds Ratio | Std. Err. | z     | P> z  | [95% Conf. Interval] |          |
|---------------|------------|-----------|-------|-------|----------------------|----------|
| preop_gfr_tot | .9901436   | .0070322  | -1.39 | 0.163 | .9764562             | 1.004023 |
| _cons         | .2903003   | .1764113  | -2.04 | 0.042 | .0882236             | .9552351 |

Note: \_cons estimates baseline odds.

. logistic target\_ai preop\_quick\_tot

```

Logistic regression          Number of obs   =      611
                             LR chi2(1)         =      1.42
                             Prob > chi2        =     0.2326
Log likelihood = -212.65497   Pseudo R2      =     0.0033

```

| target_ai       | Odds Ratio | Std. Err. | z     | P> z  | [95% Conf. Interval] |          |
|-----------------|------------|-----------|-------|-------|----------------------|----------|
| preop_quick_tot | 1.011024   | .0095882  | 1.16  | 0.248 | .992405              | 1.029992 |
| _cons           | .0383925   | .0398849  | -3.14 | 0.002 | .0050114             | .2941283 |

Note: \_cons estimates baseline odds.

. logistic target\_ai preop\_albumin\_tot

```

Logistic regression          Number of obs   =      611
                             LR chi2(1)         =      0.31
                             Prob > chi2        =     0.5805
Log likelihood = -213.21461   Pseudo R2      =     0.0007

```

| target_ai         | Odds Ratio | Std. Err. | z     | P> z  | [95% Conf. Interval] |          |
|-------------------|------------|-----------|-------|-------|----------------------|----------|
| preop_albumin_tot | 1.017346   | .0319252  | 0.55  | 0.584 | .9566591             | 1.081882 |
| _cons             | .0628771   | .0796891  | -2.18 | 0.029 | .0052444             | .7538537 |

Note: \_cons estimates baseline odds.

. logistic target\_ai preop\_bilirubin\_tot

```

Logistic regression          Number of obs   =      611
                             LR chi2(1)         =      0.05
                             Prob > chi2        =     0.8241
Log likelihood = -213.34265   Pseudo R2      =     0.0001

```

| target_ai | Odds Ratio | Std. Err. | z | P> z | [95% Conf. Interval] |  |
|-----------|------------|-----------|---|------|----------------------|--|
|-----------|------------|-----------|---|------|----------------------|--|

|                     | Odds Ratio | Std. Err. | z     | P> z  | [95% Conf. Interval] |
|---------------------|------------|-----------|-------|-------|----------------------|
| preop_bilirubin_tot | 1.132906   | .6303181  | 0.22  | 0.823 | .3807227 3.371159    |
| _cons               | .1184447   | .0332778  | -7.59 | 0.000 | .0682913 .2054311    |

Note: \_cons estimates baseline odds.

. logistic target\_ai preop\_platelet\_bin

|                             |               |   |        |
|-----------------------------|---------------|---|--------|
| Logistic regression         | Number of obs | = | 611    |
|                             | LR chi2(1)    | = | 0.81   |
|                             | Prob > chi2   | = | 0.3694 |
| Log likelihood = -212.96449 | Pseudo R2     | = | 0.0019 |

|                    | Odds Ratio | Std. Err. | z      | P> z  | [95% Conf. Interval] |
|--------------------|------------|-----------|--------|-------|----------------------|
| preop_platelet_bin | 1.545364   | .7182246  | 0.94   | 0.349 | .621478 3.842695     |
| _cons              | .1213307   | .0163171  | -15.68 | 0.000 | .0932176 .1579225    |

Note: \_cons estimates baseline odds.

. logistic target\_ai preop\_platelet\_tot

|                             |               |   |        |
|-----------------------------|---------------|---|--------|
| Logistic regression         | Number of obs | = | 611    |
|                             | LR chi2(1)    | = | 0.41   |
|                             | Prob > chi2   | = | 0.5207 |
| Log likelihood = -213.16115 | Pseudo R2     | = | 0.0010 |

|                    | Odds Ratio | Std. Err. | z     | P> z  | [95% Conf. Interval] |
|--------------------|------------|-----------|-------|-------|----------------------|
| preop_platelet_tot | 1.000963   | .0014758  | 0.65  | 0.514 | .9980749 1.00386     |
| _cons              | .0988148   | .0384038  | -5.96 | 0.000 | .0461325 .2116589    |

Note: \_cons estimates baseline odds.

. logistic target\_ai preop\_leuko\_bin

|                            |               |   |        |
|----------------------------|---------------|---|--------|
| Logistic regression        | Number of obs | = | 611    |
|                            | LR chi2(1)    | = | 0.04   |
|                            | Prob > chi2   | = | 0.8497 |
| Log likelihood = -213.3494 | Pseudo R2     | = | 0.0001 |

|                 | Odds Ratio | Std. Err. | z      | P> z  | [95% Conf. Interval] |
|-----------------|------------|-----------|--------|-------|----------------------|
| preop_leuko_bin | .9237718   | .389726   | -0.19  | 0.851 | .4040685 2.111905    |
| _cons           | .126294    | .017161   | -15.23 | 0.000 | .0967654 .1648335    |

Note: \_cons estimates baseline odds.

. logistic target\_ai preop\_leuko\_tot

|                            |               |   |        |
|----------------------------|---------------|---|--------|
| Logistic regression        | Number of obs | = | 611    |
|                            | LR chi2(1)    | = | 7.59   |
|                            | Prob > chi2   | = | 0.0059 |
| Log likelihood = -209.5732 | Pseudo R2     | = | 0.0178 |

|                 | Odds Ratio | Std. Err. | z     | P> z  | [95% Conf. Interval] |
|-----------------|------------|-----------|-------|-------|----------------------|
| preop_leuko_tot | 1.136185   | .0506514  | 2.86  | 0.004 | 1.041123 1.239926    |
| _cons           | .0534632   | .0180411  | -8.68 | 0.000 | .0275942 .103584     |

Note: \_cons estimates baseline odds.

. logistic target\_ai preop\_diabetes

|                             |               |   |        |
|-----------------------------|---------------|---|--------|
| Logistic regression         | Number of obs | = | 611    |
|                             | LR chi2(1)    | = | 0.01   |
|                             | Prob > chi2   | = | 0.9257 |
| Log likelihood = -213.36301 | Pseudo R2     | = | 0.0000 |

|                | Odds Ratio | Std. Err. | z      | P> z  | [95% Conf. Interval] |
|----------------|------------|-----------|--------|-------|----------------------|
| preop_diabetes | .9636364   | .3841449  | -0.09  | 0.926 | .4411532 2.104927    |
| _cons          | .1257862   | .01723    | -15.14 | 0.000 | .0961693 .164524     |

Note: \_cons estimates baseline odds.

. logistic target\_ai preop\_weight

|                             |               |   |        |
|-----------------------------|---------------|---|--------|
| Logistic regression         | Number of obs | = | 611    |
|                             | LR chi2(1)    | = | 1.97   |
|                             | Prob > chi2   | = | 0.1605 |
| Log likelihood = -212.38255 | Pseudo R2     | = | 0.0046 |

|              | Odds Ratio | Std. Err. | z     | P> z  | [95% Conf. Interval] |
|--------------|------------|-----------|-------|-------|----------------------|
| preop_weight | 1.0099     | .0070184  | 1.42  | 0.156 | .9962377 1.02375     |
| _cons        | .0540962   | .0332429  | -4.75 | 0.000 | .0162215 .1804023    |

Note: \_cons estimates baseline odds.

. logistic target\_ai preop\_height

|                     |               |   |        |
|---------------------|---------------|---|--------|
| Logistic regression | Number of obs | = | 611    |
|                     | LR chi2(1)    | = | 3.57   |
|                     | Prob > chi2   | = | 0.0589 |



Log likelihood = -211.58301                      Pseudo R2                      =                      0.0084

| target_ai    | Odds Ratio | Std. Err. | z     | P> z  | [95% Conf. Interval] |          |
|--------------|------------|-----------|-------|-------|----------------------|----------|
| preop_height | 17.42878   | 26.54851  | 1.88  | 0.061 | .8803766             | 345.0369 |
| _cons        | .0007789   | .0021207  | -2.63 | 0.009 | 3.75e-06             | .1618102 |

Note: \_cons estimates baseline odds.

. logistic target\_ai preop\_bmi

Logistic regression                                      Number of obs                      =                      611  
LR chi2(1)                                                      =                      0.40  
Prob > chi2                                                      =                      0.5287  
Log likelihood = -213.16888                              Pseudo R2                              =                      0.0009

| target_ai | Odds Ratio | Std. Err. | z     | P> z  | [95% Conf. Interval] |          |
|-----------|------------|-----------|-------|-------|----------------------|----------|
| preop_bmi | 1.01659    | .0263484  | 0.63  | 0.526 | .9662383             | 1.069567 |
| _cons     | .080502    | .0572953  | -3.54 | 0.000 | .0199519             | .3248091 |

Note: \_cons estimates baseline odds.

. logistic target\_ai preop\_ecog

Logistic regression                                      Number of obs                      =                      611  
LR chi2(1)                                                      =                      0.08  
Prob > chi2                                                      =                      0.7804  
Log likelihood = -213.3285                              Pseudo R2                              =                      0.0002

| target_ai  | Odds Ratio | Std. Err. | z      | P> z  | [95% Conf. Interval] |          |
|------------|------------|-----------|--------|-------|----------------------|----------|
| preop_ecog | .949336    | .1781635  | -0.28  | 0.782 | .6571637             | 1.371407 |
| _cons      | .1287093   | .0207446  | -12.72 | 0.000 | .0938466             | .176523  |

Note: \_cons estimates baseline odds.

. logistic target\_ai preop\_tstage

Logistic regression                                      Number of obs                      =                      611  
LR chi2(1)                                                      =                      0.16  
Prob > chi2                                                      =                      0.6924  
Log likelihood = -213.28912                              Pseudo R2                              =                      0.0004

| target_ai    | Odds Ratio | Std. Err. | z     | P> z  | [95% Conf. Interval] |          |
|--------------|------------|-----------|-------|-------|----------------------|----------|
| preop_tstage | .9158231   | .2007689  | -0.40 | 0.688 | .5959492             | 1.407388 |
| _cons        | .1599019   | .0991961  | -2.96 | 0.003 | .047403              | .5393882 |

Note: \_cons estimates baseline odds.

. logistic target\_ai preop\_neoadj

Logistic regression                                      Number of obs                      =                      611  
LR chi2(1)                                                      =                      2.29  
Prob > chi2                                                      =                      0.1301  
Log likelihood = -212.22189                              Pseudo R2                              =                      0.0054

| target_ai    | Odds Ratio | Std. Err. | z     | P> z  | [95% Conf. Interval] |          |
|--------------|------------|-----------|-------|-------|----------------------|----------|
| preop_neoadj | .7816487   | .1255859  | -1.53 | 0.125 | .5704936             | 1.070958 |
| _cons        | .1774869   | .0449599  | -6.82 | 0.000 | .1080302             | .2916001 |

Note: \_cons estimates baseline odds.

. logistic target\_ai preop\_asa

Logistic regression                                      Number of obs                      =                      611  
LR chi2(1)                                                      =                      0.61  
Prob > chi2                                                      =                      0.4352  
Log likelihood = -213.06291                              Pseudo R2                              =                      0.0014

| target_ai | Odds Ratio | Std. Err. | z     | P> z  | [95% Conf. Interval] |          |
|-----------|------------|-----------|-------|-------|----------------------|----------|
| preop_asa | 1.152269   | .2096101  | 0.78  | 0.436 | .8066982             | 1.645874 |
| _cons     | .1039008   | .0287242  | -8.19 | 0.000 | .0604363             | .1786241 |

Note: \_cons estimates baseline odds.

. logistic target\_ai preop\_weightloss\_bin

Logistic regression                                      Number of obs                      =                      611  
LR chi2(1)                                                      =                      8.40  
Prob > chi2                                                      =                      0.0037  
Log likelihood = -209.16636                              Pseudo R2                              =                      0.0197

| target_ai            | Odds Ratio | Std. Err. | z      | P> z  | [95% Conf. Interval] |          |
|----------------------|------------|-----------|--------|-------|----------------------|----------|
| preop_weightloss_bin | .3468124   | .1426192  | -2.58  | 0.010 | .1549017             | .7764849 |
| _cons                | .1495098   | .020524   | -13.84 | 0.000 | .1142407             | .1956673 |

Note: \_cons estimates baseline odds.

. logistic target\_ai preop\_fev1\_bin

```

Logistic regression          Number of obs   =      611
                             LR chi2(1)           =      0.13
                             Prob > chi2          =     0.7233
Log likelihood = -213.30466   Pseudo R2      =     0.0003

```

| target_ai      | Odds Ratio | Std. Err. | z      | P> z  | [95% Conf. Interval] |          |
|----------------|------------|-----------|--------|-------|----------------------|----------|
| preop_fev1_bin | .894657    | .2836487  | -0.35  | 0.726 | .4806016             | 1.665436 |
| _cons          | .128266    | .0185405  | -14.21 | 0.000 | .0966213             | .1702747 |

Note: \_cons estimates baseline odds.

```
. logistic target_ai preop_fev1_tot
```

```

Logistic regression          Number of obs   =      611
                             LR chi2(1)           =      0.11
                             Prob > chi2          =     0.7387
Log likelihood = -213.31171   Pseudo R2      =     0.0003

```

| target_ai      | Odds Ratio | Std. Err. | z     | P> z  | [95% Conf. Interval] |          |
|----------------|------------|-----------|-------|-------|----------------------|----------|
| preop_fev1_tot | 1.056522   | .1739559  | 0.33  | 0.738 | .7651183             | 1.45891  |
| _cons          | .1057151   | .0555463  | -4.28 | 0.000 | .0377474             | .2960652 |

Note: \_cons estimates baseline odds.

```
. logistic target_ai preop_vc_bin
```

```

Logistic regression          Number of obs   =      611
                             LR chi2(1)           =      0.07
                             Prob > chi2          =     0.7912
Log likelihood = -213.33231   Pseudo R2      =     0.0002

```

| target_ai    | Odds Ratio | Std. Err. | z      | P> z  | [95% Conf. Interval] |          |
|--------------|------------|-----------|--------|-------|----------------------|----------|
| preop_vc_bin | .9153947   | .3079483  | -0.26  | 0.793 | .4734295             | 1.769952 |
| _cons        | .1272727   | .0180574  | -14.53 | 0.000 | .0963756             | .1680752 |

Note: \_cons estimates baseline odds.

```
. logistic target_ai preop_vc_tot
```

```

Logistic regression          Number of obs   =      611
                             LR chi2(1)           =      0.71
                             Prob > chi2          =     0.3990
Log likelihood = -213.01162   Pseudo R2      =     0.0017

```

| target_ai    | Odds Ratio | Std. Err. | z     | P> z  | [95% Conf. Interval] |          |
|--------------|------------|-----------|-------|-------|----------------------|----------|
| preop_vc_tot | 1.123223   | .1546842  | 0.84  | 0.399 | .8575176             | 1.471258 |
| _cons        | .0790442   | .0447057  | -4.49 | 0.000 | .0260885             | .239492  |

Note: \_cons estimates baseline odds.

```
. logistic target_ai psm_robot
```

```

Logistic regression          Number of obs   =      611
                             LR chi2(1)           =      1.00
                             Prob > chi2          =     0.3180
Log likelihood = -212.86877   Pseudo R2      =     0.0023

```

| target_ai | Odds Ratio | Std. Err. | z      | P> z  | [95% Conf. Interval] |          |
|-----------|------------|-----------|--------|-------|----------------------|----------|
| psm_robot | .6539171   | .2918519  | -0.95  | 0.341 | .2726592             | 1.568286 |
| _cons     | .1310782   | .0177044  | -15.04 | 0.000 | .1005914             | .1708048 |

Note: \_cons estimates baseline odds.

```

. logistic target_ai preop_diag preop_age preop_sex preop_smoke preop_alcohol preop_khk preop_aht preop_vhf preop_mi
preop_revasc preop_pavk preop_copd preop_liver preop_crea_tot
> preop_gfr_tot preop_quick_tot preop_albumin_tot preop_bilirubin_tot preop_platelet_bin preop_platelet_tot preop_leuko_bin
preop_leuko_tot preop_diabetes preop_weight preop_heig
> ht preop_bmi preop_ecog preop_tstage preop_neoadj preop_asa preop_weightloss_bin preop_fev1_bin preop_fev1_tot
preop_vc_bin preop_vc_tot psm_robot

```

```

Logistic regression          Number of obs   =      611
                             LR chi2(36)          =     60.01
                             Prob > chi2          =     0.0073
Log likelihood = -183.3616   Pseudo R2      =     0.1406

```

| target_ai     | Odds Ratio | Std. Err. | z     | P> z  | [95% Conf. Interval] |          |
|---------------|------------|-----------|-------|-------|----------------------|----------|
| preop_diag    | 2.310569   | .8731838  | 2.22  | 0.027 | 1.101647             | 4.846132 |
| preop_age     | 1.024795   | .026794   | 0.94  | 0.349 | .9736024             | 1.078679 |
| preop_sex     | 1.415994   | .890799   | 0.55  | 0.580 | .4126411             | 4.859041 |
| preop_smoke   | 1.079326   | .2385854  | 0.35  | 0.730 | .699833              | 1.664604 |
| preop_alcohol | .7860342   | .1402737  | -1.35 | 0.177 | .5540362             | 1.115179 |
| preop_khk     | 1.307555   | .7721066  | 0.45  | 0.650 | .4109875             | 4.159982 |
| preop_aht     | 2.584473   | .8759357  | 2.80  | 0.005 | 1.330089             | 5.021844 |
| preop_vhf     | 1.018108   | .5336737  | 0.03  | 0.973 | .3644261             | 2.844318 |
| preop_mi      | .6427659   | .4499564  | -0.63 | 0.528 | .162999              | 2.534666 |
| preop_revasc  | 1.611995   | 1.171279  | 0.66  | 0.511 | .3880422             | 6.696511 |
| preop_pavk    | 2.103952   | 1.340246  | 1.17  | 0.243 | .6036826             | 7.332684 |

|                      |          |          |       |       |          |          |
|----------------------|----------|----------|-------|-------|----------|----------|
| preop_copd           | .3014692 | .2007494 | -1.80 | 0.072 | .0817382 | 1.111888 |
| preop_liver          | .943999  | .6293319 | -0.09 | 0.931 | .2555669 | 3.486892 |
| preop_crea_tot       | .7077344 | 1.03222  | -0.24 | 0.813 | .0405887 | 12.34057 |
| preop_gfr_tot        | 1.000223 | .0191804 | 0.01  | 0.991 | .9633283 | 1.038532 |
| preop_quick_tot      | 1.023174 | .0108426 | 2.16  | 0.031 | 1.002142 | 1.044648 |
| preop_albumin_tot    | 1.027106 | .0384173 | 0.72  | 0.475 | .9545027 | 1.105231 |
| preop_bilirubin_tot  | .721798  | .4782202 | -0.49 | 0.623 | .1969974 | 2.644667 |
| preop_platelet_bin   | 2.177683 | 1.212951 | 1.40  | 0.162 | .7309414 | 6.487941 |
| preop_platelet_tot   | 1.000311 | .0017891 | 0.17  | 0.862 | .9968101 | 1.003823 |
| preop_leuko_bin      | .9801346 | .476376  | -0.04 | 0.967 | .3780726 | 2.540951 |
| preop_leuko_tot      | 1.20783  | .0713723 | 3.20  | 0.001 | 1.07574  | 1.35614  |
| preop_diabetes       | .7686087 | .3472366 | -0.58 | 0.560 | .3170702 | 1.863181 |
| preop_weight         | 1.030079 | .0943466 | 0.32  | 0.746 | .8608105 | 1.232632 |
| preop_height         | 3.048991 | 28.41221 | 0.12  | 0.905 | 3.57e-08 | 2.61e+08 |
| preop_bmi            | .9216954 | .267963  | -0.28 | 0.779 | .5213375 | 1.629505 |
| preop_ecog           | .852713  | .1932214 | -0.70 | 0.482 | .5469202 | 1.32948  |
| preop_tstage         | 1.272556 | .3649224 | 0.84  | 0.401 | .7254101 | 2.232391 |
| preop_neoadj         | .7445071 | .1664722 | -1.32 | 0.187 | .48033   | 1.153979 |
| preop_asa            | 1.207888 | .2691586 | 0.84  | 0.399 | .7797162 | 1.868707 |
| preop_weightloss_bin | .366332  | .1640709 | -2.24 | 0.025 | .15228   | .8812654 |
| preop_fev1_bin       | 1.042478 | .5303422 | 0.08  | 0.935 | .3846215 | 2.825534 |
| preop_fev1_tot       | .9010651 | .3929313 | -0.24 | 0.811 | .3833267 | 2.118084 |
| preop_vc_bin         | 1.267274 | .6333678 | 0.47  | 0.636 | .4758286 | 3.37513  |
| preop_vc_tot         | 1.39338  | .4826533 | 0.96  | 0.338 | .7066779 | 2.747372 |
| psm_robot            | .5440629 | .2846882 | -1.16 | 0.245 | .1950951 | 1.517231 |
| _cons                | 3.89e-06 | .0000669 | -0.72 | 0.469 | 8.90e-21 | 1.70e+09 |

Note: \_cons estimates baseline odds.

. logistic target\_ai preop\_diag preop\_aht preop\_quick\_tot preop\_leuko\_tot preop\_weightloss\_bin

|                             |               |   |        |
|-----------------------------|---------------|---|--------|
| Logistic regression         | Number of obs | = | 611    |
|                             | LR chi2(5)    | = | 35.55  |
|                             | Prob > chi2   | = | 0.0000 |
| Log likelihood = -195.59436 | Pseudo R2     | = | 0.0833 |

|                      | target_ai | Odds Ratio | Std. Err. | z     | P> z  | [95% Conf. Interval] |
|----------------------|-----------|------------|-----------|-------|-------|----------------------|
| preop_diag           |           | 1.627234   | .5040927  | 1.57  | 0.116 | .8866666 2.986341    |
| preop_aht            |           | 2.895973   | .8825219  | 3.49  | 0.000 | 1.59367 5.262481     |
| preop_quick_tot      |           | 1.017207   | .0100239  | 1.73  | 0.083 | .9977495 1.037045    |
| preop_leuko_tot      |           | 1.163409   | .0552633  | 3.19  | 0.001 | 1.059984 1.276925    |
| preop_weightloss_bin |           | .3405975   | .1438994  | -2.55 | 0.011 | .1488047 .7795903    |
| _cons                |           | .0038732   | .0047597  | -4.52 | 0.000 | .0003484 .0430618    |

Note: \_cons estimates baseline odds.

(R)  
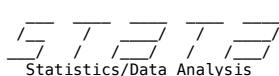 Statistics/Data Analysis 15.0  
Special Edition  
Copyright 1985–2017 StataCorp LLC  
StataCorp  
4905 Lakeway Drive  
College Station, Texas 77845 USA  
800-STATA-PC <http://www.stata.com>  
979-696-4600 [stata@stata.com](mailto:stata@stata.com)  
979-696-4601 (fax)

. ologit target\_clavien preop\_age

Iteration 0: log likelihood = -981.52826  
Iteration 1: log likelihood = -977.96471  
Iteration 2: log likelihood = -977.96282  
Iteration 3: log likelihood = -977.96282

|                             |               |   |        |
|-----------------------------|---------------|---|--------|
| Ordered logistic regression | Number of obs | = | 611    |
|                             | LR chi2(1)    | = | 7.13   |
|                             | Prob > chi2   | = | 0.0076 |
| Log likelihood = -977.96282 | Pseudo R2     | = | 0.0036 |

| target_clavien | Coef.    | Std. Err. | z    | P> z  | [95% Conf. Interval] |
|----------------|----------|-----------|------|-------|----------------------|
| preop_age      | .0197859 | .0074462  | 2.66 | 0.008 | .0051916 .0343803    |
| /cut1          | .6396768 | .4779252  |      |       | -.2970394 1.576393   |
| /cut2          | .8581883 | .4785229  |      |       | -.0796992 1.796076   |
| /cut3          | 1.212152 | .4792392  |      |       | .2728604 2.151444    |
| /cut4          | 2.917729 | .4898475  |      |       | 1.957646 3.877813    |
| /cut5          | 3.427267 | .4962155  |      |       | 2.454702 4.399831    |
| /cut6          | 4.007845 | .5080483  |      |       | 3.012089 5.003602    |
| /cut7          | 5.022014 | .5510373  |      |       | 3.942 6.102027       |

. ologit target\_clavien preop\_diag

Iteration 0: log likelihood = -981.52826  
Iteration 1: log likelihood = -981.01808  
Iteration 2: log likelihood = -981.01804

|                             |               |   |        |
|-----------------------------|---------------|---|--------|
| Ordered logistic regression | Number of obs | = | 611    |
|                             | LR chi2(1)    | = | 1.02   |
|                             | Prob > chi2   | = | 0.3124 |
| Log likelihood = -981.01804 | Pseudo R2     | = | 0.0005 |





Log likelihood = -981.19171  
Prob > chi2 = 0.4120  
Pseudo R2 = 0.0003

| target_clavien | Coef.     | Std. Err. | z    | P> z  | [95% Conf. Interval] |
|----------------|-----------|-----------|------|-------|----------------------|
| preop_mi       | .2241527  | .2732275  | 0.82 | 0.412 | -.3113634 .7596689   |
| /cut1          | -.5933848 | .0872965  |      |       | -.7644828 -.4222868  |
| /cut2          | -.3770443 | .0851901  |      |       | -.5440138 -.2100748  |
| /cut3          | -.0251194 | .0836755  |      |       | -.1891204 .1388816   |
| /cut4          | 1.673004  | .1124702  |      |       | 1.452566 1.893441    |
| /cut5          | 2.181275  | .1349955  |      |       | 1.916688 2.445861    |
| /cut6          | 2.760483  | .171282   |      |       | 2.424776 3.096189    |
| /cut7          | 3.772448  | .2715287  |      |       | 3.240261 4.304634    |

. ologit target\_clavien preop\_revasc

Iteration 0: log likelihood = -981.52826  
Iteration 1: log likelihood = -981.50739  
Iteration 2: log likelihood = -981.50739

Ordered logistic regression  
Number of obs = 611  
LR chi2(1) = 0.04  
Prob > chi2 = 0.8381  
Pseudo R2 = 0.0000  
Log likelihood = -981.50739

| target_clavien | Coef.     | Std. Err. | z    | P> z  | [95% Conf. Interval] |
|----------------|-----------|-----------|------|-------|----------------------|
| preop_revasc   | .0586372  | .2869263  | 0.20 | 0.838 | -.5037279 .6210023   |
| /cut1          | -.6065968 | .0871376  |      |       | -.7773833 -.4358102  |
| /cut2          | -.3903728 | .0849967  |      |       | -.5569633 -.2237822  |
| /cut3          | -.0384434 | .0833961  |      |       | -.2018967 .12501     |
| /cut4          | 1.659309  | .1119935  |      |       | 1.439806 1.878812    |
| /cut5          | 2.167192  | .134528   |      |       | 1.903522 2.430862    |
| /cut6          | 2.74586   | .1708494  |      |       | 2.411002 3.080719    |
| /cut7          | 3.757099  | .2711888  |      |       | 3.225579 4.28862     |

. ologit target\_clavien preop\_pavk

Iteration 0: log likelihood = -981.52826  
Iteration 1: log likelihood = -981.10124  
Iteration 2: log likelihood = -981.10118

Ordered logistic regression  
Number of obs = 611  
LR chi2(1) = 0.85  
Prob > chi2 = 0.3554  
Pseudo R2 = 0.0004  
Log likelihood = -981.10118

| target_clavien | Coef.     | Std. Err. | z    | P> z  | [95% Conf. Interval] |
|----------------|-----------|-----------|------|-------|----------------------|
| preop_pavk     | .3398446  | .3675006  | 0.92 | 0.355 | -.3804433 1.060133   |
| /cut1          | -.5975933 | .0859028  |      |       | -.7659596 -.429227   |
| /cut2          | -.3808158 | .083823   |      |       | -.5451059 -.2165256  |
| /cut3          | -.0281981 | .0824237  |      |       | -.1897457 .1333494   |
| /cut4          | 1.670379  | .1115776  |      |       | 1.45169 1.889067     |
| /cut5          | 2.178111  | .1341378  |      |       | 1.915206 2.441016    |
| /cut6          | 2.756676  | .1704891  |      |       | 2.422524 3.090829    |
| /cut7          | 3.767664  | .2709175  |      |       | 3.236675 4.298652    |

. ologit target\_clavien preop\_copd

Iteration 0: log likelihood = -981.52826  
Iteration 1: log likelihood = -981.13935  
Iteration 2: log likelihood = -981.1393

Ordered logistic regression  
Number of obs = 611  
LR chi2(1) = 0.78  
Prob > chi2 = 0.3778  
Pseudo R2 = 0.0004  
Log likelihood = -981.1393

| target_clavien | Coef.     | Std. Err. | z    | P> z  | [95% Conf. Interval] |
|----------------|-----------|-----------|------|-------|----------------------|
| preop_copd     | .1830847  | .2074226  | 0.88 | 0.377 | -.2234561 .5896255   |
| /cut1          | -.5930072 | .0870495  |      |       | -.7636211 -.4223932  |
| /cut2          | -.3766252 | .0849443  |      |       | -.543113 -.2101375   |
| /cut3          | -.0244099 | .0835086  |      |       | -.1880838 .139264    |
| /cut4          | 1.674716  | .1125868  |      |       | 1.45405 1.895382     |
| /cut5          | 2.182809  | .1350564  |      |       | 1.918103 2.447515    |
| /cut6          | 2.761873  | .1713133  |      |       | 2.426105 3.09764     |
| /cut7          | 3.774009  | .2715727  |      |       | 3.241736 4.306281    |

. ologit target\_clavien preop\_liver

Iteration 0: log likelihood = -981.52826  
Iteration 1: log likelihood = -981.11952  
Iteration 2: log likelihood = -981.1195

Ordered logistic regression  
Number of obs = 611  
LR chi2(1) = 0.82  
Prob > chi2 = 0.3659

Log likelihood = -981.1195                      Pseudo R2                      =                      0.0004

| target_clavien | Coef.     | Std. Err. | z     | P> z  | [95% Conf. Interval] |           |
|----------------|-----------|-----------|-------|-------|----------------------|-----------|
| preop_liver    | -.2923422 | .3241039  | -0.90 | 0.367 | -.9275742            | .3428898  |
| /cut1          | -.6277803 | .0868475  |       |       | -.7979983            | -.4575623 |
| /cut2          | -.4112367 | .0845855  |       |       | -.5770212            | -.2454522 |
| /cut3          | -.0586579 | .0829019  |       |       | -.2211426            | .1038268  |
| /cut4          | 1.641168  | .1112937  |       |       | 1.423036             | 1.8593    |
| /cut5          | 2.149525  | .1338379  |       |       | 1.887208             | 2.411843  |
| /cut6          | 2.728318  | .1702229  |       |       | 2.394688             | 3.061949  |
| /cut7          | 3.739179  | .2707711  |       |       | 3.208478             | 4.269881  |

. ologit target\_clavien preop\_crea\_tot

Iteration 0: log likelihood = -981.52826  
Iteration 1: log likelihood = -978.36014  
Iteration 2: log likelihood = -978.35218  
Iteration 3: log likelihood = -978.35218

Ordered logistic regression                      Number of obs                      =                      611  
LR chi2(1)                                              =                      6.35  
Prob > chi2                                              =                      0.0117  
Log likelihood = -978.35218                      Pseudo R2                                              =                      0.0032

| target_clavien | Coef.    | Std. Err. | z    | P> z  | [95% Conf. Interval] |          |
|----------------|----------|-----------|------|-------|----------------------|----------|
| preop_crea_tot | .8881583 | .3470551  | 2.56 | 0.010 | .2079428             | 1.568374 |
| /cut1          | .1608635 | .3129202  |      |       | -.4524489            | .7741759 |
| /cut2          | .378531  | .3130046  |      |       | -.2349468            | .9920087 |
| /cut3          | .733757  | .3140685  |      |       | .118194              | 1.34932  |
| /cut4          | 2.443843 | .3295912  |      |       | 1.797856             | 3.089829 |
| /cut5          | 2.953305 | .3390982  |      |       | 2.288685             | 3.617925 |
| /cut6          | 3.535264 | .3572197  |      |       | 2.835126             | 4.235402 |
| /cut7          | 4.552139 | .4175773  |      |       | 3.733703             | 5.370576 |

. ologit target\_clavien preop\_gfr\_tot

Iteration 0: log likelihood = -981.52826  
Iteration 1: log likelihood = -977.11707  
Iteration 2: log likelihood = -977.11431  
Iteration 3: log likelihood = -977.11431

Ordered logistic regression                      Number of obs                      =                      611  
LR chi2(1)                                              =                      8.83  
Prob > chi2                                              =                      0.0030  
Log likelihood = -977.11431                      Pseudo R2                                              =                      0.0045

| target_clavien | Coef.     | Std. Err. | z     | P> z  | [95% Conf. Interval] |           |
|----------------|-----------|-----------|-------|-------|----------------------|-----------|
| preop_gfr_tot  | -.0119344 | .0040387  | -2.95 | 0.003 | -.0198501            | -.0040186 |
| /cut1          | -1.646449 | .3610245  |       |       | -2.354044            | -.9388543 |
| /cut2          | -1.428261 | .3597246  |       |       | -2.133308            | -.7232135 |
| /cut3          | -1.07268  | .3579142  |       |       | -1.774179            | -.3711808 |
| /cut4          | .6403928  | .3585844  |       |       | -.0624196            | 1.343205  |
| /cut5          | 1.149555  | .3655972  |       |       | .4329978             | 1.866113  |
| /cut6          | 1.729775  | .3797228  |       |       | .9855323             | 2.474018  |
| /cut7          | 2.745033  | .4328452  |       |       | 1.896672             | 3.593394  |

. ologit target\_clavien preop\_quick\_tot

Iteration 0: log likelihood = -981.52826  
Iteration 1: log likelihood = -981.49916  
Iteration 2: log likelihood = -981.49915

Ordered logistic regression                      Number of obs                      =                      611  
LR chi2(1)                                              =                      0.06  
Prob > chi2                                              =                      0.8093  
Log likelihood = -981.49915                      Pseudo R2                                              =                      0.0000

| target_clavien  | Coef.     | Std. Err. | z     | P> z  | [95% Conf. Interval] |          |
|-----------------|-----------|-----------|-------|-------|----------------------|----------|
| preop_quick_tot | -.001196  | .0049578  | -0.24 | 0.809 | -.0109132            | .0085211 |
| /cut1           | -.7387263 | .5371624  |       |       | -1.791545            | .3140926 |
| /cut2           | -.5225544 | .5369617  |       |       | -1.57498             | .5298712 |
| /cut3           | -.1706999 | .5373203  |       |       | -1.223828            | .8824284 |
| /cut4           | 1.526775  | .5439297  |       |       | .4606924             | 2.592858 |
| /cut5           | 2.034515  | .549356   |       |       | .957797              | 3.111233 |
| /cut6           | 2.613087  | .559324   |       |       | 1.516832             | 3.709342 |
| /cut7           | 3.62459   | .5963     |       |       | 2.455863             | 4.793316 |

. ologit target\_clavien preop\_albumin\_tot

Iteration 0: log likelihood = -981.52826  
Iteration 1: log likelihood = -979.63938  
Iteration 2: log likelihood = -979.63889  
Iteration 3: log likelihood = -979.63889

Ordered logistic regression                      Number of obs                      =                      611

Log likelihood = -979.63889

LR chi2(1) = 3.78  
 Prob > chi2 = 0.0519  
 Pseudo R2 = 0.0019

| target_clavien    | Coef.    | Std. Err. | z    | P> z  | [95% Conf. Interval] |
|-------------------|----------|-----------|------|-------|----------------------|
| preop_albumin_tot | .0342749 | .0176978  | 1.94 | 0.053 | -.0004122 .0689619   |
| /cut1             | .7550477 | .7100647  |      |       | -.6366535 2.146749   |
| /cut2             | .9721878 | .7103842  |      |       | -.4201397 2.364515   |
| /cut3             | 1.32643  | .7115513  |      |       | -.068185 2.721045    |
| /cut4             | 3.033393 | .7214558  |      |       | 1.619366 4.447421    |
| /cut5             | 3.542404 | .7260377  |      |       | 2.119397 4.965412    |
| /cut6             | 4.122305 | .7344104  |      |       | 2.682887 5.561723    |
| /cut7             | 5.133724 | .7642436  |      |       | 3.635834 6.631614    |

. ologit target\_clavien preop\_bilirubin\_tot

Iteration 0: log likelihood = -981.52826  
 Iteration 1: log likelihood = -981.19298  
 Iteration 2: log likelihood = -981.19293

Ordered logistic regression

Number of obs = 611  
 LR chi2(1) = 0.67  
 Prob > chi2 = 0.4128  
 Pseudo R2 = 0.0003

Log likelihood = -981.19293

| target_clavien      | Coef.     | Std. Err. | z    | P> z  | [95% Conf. Interval] |
|---------------------|-----------|-----------|------|-------|----------------------|
| preop_bilirubin_tot | .2688064  | .3297141  | 0.82 | 0.415 | -.3774212 .9150341   |
| /cut1               | -.4921464 | .1681456  |      |       | -.8217058 -.162587   |
| /cut2               | -.2756614 | .1673699  |      |       | -.6037004 .0523777   |
| /cut3               | .0768136  | .1671881  |      |       | -.250869 .4044961    |
| /cut4               | 1.77502   | .1840105  |      |       | 1.414366 2.135674    |
| /cut5               | 2.282869  | .1985835  |      |       | 1.893652 2.672085    |
| /cut6               | 2.861859  | .22512    |      |       | 2.420631 3.303086    |
| /cut7               | 3.873487  | .3085447  |      |       | 3.268751 4.478224    |

. ologit target\_clavien preop\_platelet\_bin

Iteration 0: log likelihood = -981.52826  
 Iteration 1: log likelihood = -981.50273  
 Iteration 2: log likelihood = -981.50273

Ordered logistic regression

Number of obs = 611  
 LR chi2(1) = 0.05  
 Prob > chi2 = 0.8212  
 Pseudo R2 = 0.0000

Log likelihood = -981.50273

| target_clavien     | Coef.     | Std. Err. | z     | P> z  | [95% Conf. Interval] |
|--------------------|-----------|-----------|-------|-------|----------------------|
| preop_platelet_bin | -.0671303 | .2972627  | -0.23 | 0.821 | -.6497546 .5154939   |
| /cut1              | -.6151501 | .0869077  |       |       | -.785486 -.4448142   |
| /cut2              | -.3989604 | .0847608  |       |       | -.5650886 -.2328322  |
| /cut3              | -.046966  | .083249   |       |       | -.210131 .116199     |
| /cut4              | 1.650954  | .1118861  |       |       | 1.431661 1.870247    |
| /cut5              | 2.158776  | .1344019  |       |       | 1.895353 2.422199    |
| /cut6              | 2.737404  | .1706614  |       |       | 2.402914 3.071894    |
| /cut7              | 3.748719  | .2709847  |       |       | 3.217598 4.279839    |

. ologit target\_clavien preop\_platelet\_tot

Iteration 0: log likelihood = -981.52826  
 Iteration 1: log likelihood = -980.39596  
 Iteration 2: log likelihood = -980.39578  
 Iteration 3: log likelihood = -980.39578

Ordered logistic regression

Number of obs = 611  
 LR chi2(1) = 2.26  
 Prob > chi2 = 0.1323  
 Pseudo R2 = 0.0012

Log likelihood = -980.39578

| target_clavien     | Coef.     | Std. Err. | z     | P> z  | [95% Conf. Interval] |
|--------------------|-----------|-----------|-------|-------|----------------------|
| preop_platelet_tot | -.0013101 | .0008739  | -1.50 | 0.134 | -.0030229 .0004027   |
| /cut1              | -.9313406 | .2302163  |       |       | -1.382556 -.480125   |
| /cut2              | -.7142602 | .2287963  |       |       | -1.162693 -.2658277  |
| /cut3              | -.3601338 | .2267717  |       |       | -.8045982 .0843305   |
| /cut4              | 1.341942  | .2354458  |       |       | .8804765 1.803407    |
| /cut5              | 1.849706  | .246907   |       |       | 1.365777 2.333635    |
| /cut6              | 2.428738  | .2681346  |       |       | 1.903204 2.954272    |
| /cut7              | 3.439769  | .3409394  |       |       | 2.77154 4.107998     |

. ologit target\_clavien preop\_leuko\_bin

Iteration 0: log likelihood = -981.52826  
 Iteration 1: log likelihood = -979.24189  
 Iteration 2: log likelihood = -979.24118  
 Iteration 3: log likelihood = -979.24118



Ordered logistic regression                      Number of obs        =        611  
 LR chi2(1)                                        =        4.57  
 Prob > chi2                                       =        0.0325  
 Log likelihood = -979.24118                      Pseudo R2            =        0.0023

| target_clavien  | Coef.     | Std. Err. | z     | P> z  | [95% Conf. Interval] |
|-----------------|-----------|-----------|-------|-------|----------------------|
| preop_leuko_bin | -.4955335 | .2334357  | -2.12 | 0.034 | -.953059 - .0380079  |
| /cut1           | -.6705025 | .089461   |       |       | -.8458427 -.4951622  |
| /cut2           | -.453601  | .0872112  |       |       | -.6245318 -.2826703  |
| /cut3           | -.100145  | .0854434  |       |       | -.2676109 .0673209   |
| /cut4           | 1.605438  | .1125215  |       |       | 1.3849 1.825976      |
| /cut5           | 2.11482   | .1347966  |       |       | 1.850623 2.379017    |
| /cut6           | 2.695028  | .1709039  |       |       | 2.360062 3.029993    |
| /cut7           | 3.708016  | .2711237  |       |       | 3.176623 4.239408    |

. ologit target\_clavien preop\_leuko\_tot

Iteration 0: log likelihood = -981.52826  
 Iteration 1: log likelihood = -979.80862  
 Iteration 2: log likelihood = -979.80758  
 Iteration 3: log likelihood = -979.80758

Ordered logistic regression                      Number of obs        =        611  
 LR chi2(1)                                        =        3.44  
 Prob > chi2                                       =        0.0636  
 Log likelihood = -979.80758                      Pseudo R2            =        0.0018

| target_clavien  | Coef.     | Std. Err. | z    | P> z  | [95% Conf. Interval] |
|-----------------|-----------|-----------|------|-------|----------------------|
| preop_leuko_tot | .0553174  | .0297323  | 1.86 | 0.063 | -.0029568 .1135917   |
| /cut1           | -.2648015 | .2040458  |      |       | -.6647239 .1351209   |
| /cut2           | -.0481779 | .2034309  |      |       | -.4468952 .3505393   |
| /cut3           | .3050188  | .2035663  |      |       | -.0939638 .7040013   |
| /cut4           | 2.010163  | .2218114  |      |       | 1.575421 2.444906    |
| /cut5           | 2.519138  | .2347245  |      |       | 2.059087 2.97919     |
| /cut6           | 3.098472  | .2576517  |      |       | 2.593484 3.60346     |
| /cut7           | 4.111363  | .3333381  |      |       | 3.458032 4.764694    |

. ologit target\_clavien preop\_diabetes

Iteration 0: log likelihood = -981.52826  
 Iteration 1: log likelihood = -980.59378  
 Iteration 2: log likelihood = -980.59358  
 Iteration 3: log likelihood = -980.59358

Ordered logistic regression                      Number of obs        =        611  
 LR chi2(1)                                        =        1.87  
 Prob > chi2                                       =        0.1715  
 Log likelihood = -980.59358                      Pseudo R2            =        0.0010

| target_clavien | Coef.     | Std. Err. | z    | P> z  | [95% Conf. Interval] |
|----------------|-----------|-----------|------|-------|----------------------|
| preop_diabetes | .3152519  | .2304941  | 1.37 | 0.171 | -.1365082 .7670119   |
| /cut1          | -.576039  | .0884104  |      |       | -.7493203 -.4027578  |
| /cut2          | -.3594743 | .0863784  |      |       | -.5287727 -.1901758  |
| /cut3          | -.0069747 | .0850407  |      |       | -.1736513 .1597019   |
| /cut4          | 1.693652  | .1140997  |      |       | 1.470021 1.917283    |
| /cut5          | 2.203263  | .1365942  |      |       | 1.935544 2.470983    |
| /cut6          | 2.783242  | .1726502  |      |       | 2.444854 3.12163     |
| /cut7          | 3.795397  | .2724013  |      |       | 3.2615 4.329294      |

. ologit target\_clavien preop\_weight

Iteration 0: log likelihood = -981.52826  
 Iteration 1: log likelihood = -980.90855  
 Iteration 2: log likelihood = -980.90847

Ordered logistic regression                      Number of obs        =        611  
 LR chi2(1)                                        =        1.24  
 Prob > chi2                                       =        0.2655  
 Log likelihood = -980.90847                      Pseudo R2            =        0.0006

| target_clavien | Coef.     | Std. Err. | z    | P> z  | [95% Conf. Interval] |
|----------------|-----------|-----------|------|-------|----------------------|
| preop_weight   | .0045568  | .0040894  | 1.11 | 0.265 | -.0034582 .0125718   |
| /cut1          | -.2317447 | .3503959  |      |       | -.918508 .4550186    |
| /cut2          | -.015367  | .3500705  |      |       | -.7014926 .6707586   |
| /cut3          | .3376547  | .3507065  |      |       | -.3497173 1.025027   |
| /cut4          | 2.039933  | .3633241  |      |       | 1.327831 2.752035    |
| /cut5          | 2.548564  | .3716715  |      |       | 1.820101 3.277027    |
| /cut6          | 3.127454  | .3865915  |      |       | 2.369749 3.88516     |
| /cut7          | 4.138779  | .4403513  |      |       | 3.275707 5.001852    |

. ologit target\_clavien preop\_height

Iteration 0: log likelihood = -981.52826  
 Iteration 1: log likelihood = -981.38544  
 Iteration 2: log likelihood = -981.38543

```

Ordered logistic regression          Number of obs   =      611
                                   LR chi2(1)        =       0.29
                                   Prob > chi2       =     0.5930
Log likelihood = -981.38543         Pseudo R2      =     0.0001

```

| target_clavien | Coef.     | Std. Err. | z     | P> z  | [95% Conf. Interval] |          |
|----------------|-----------|-----------|-------|-------|----------------------|----------|
| preop_height   | -.4509119 | .8436931  | -0.53 | 0.593 | -2.10452             | 1.202696 |
| /cut1          | -1.407543 | 1.493286  |       |       | -4.33433             | 1.519243 |
| /cut2          | -1.191056 | 1.492615  |       |       | -4.116528            | 1.734416 |
| /cut3          | -.8390615 | 1.492498  |       |       | -3.764305            | 2.086182 |
| /cut4          | .8581386  | 1.495175  |       |       | -2.072351            | 3.788628 |
| /cut5          | 1.366132  | 1.49668   |       |       | -1.567306            | 4.299571 |
| /cut6          | 1.944974  | 1.499839  |       |       | -.9946559            | 4.884605 |
| /cut7          | 2.956091  | 1.514594  |       |       | -.012459             | 5.924641 |

```
. ologit target_clavien preop_bmi
```

```

Iteration 0:  log likelihood = -981.52826
Iteration 1:  log likelihood = -980.32243
Iteration 2:  log likelihood = -980.32215
Iteration 3:  log likelihood = -980.32215

```

```

Ordered logistic regression          Number of obs   =      611
                                   LR chi2(1)        =       2.41
                                   Prob > chi2       =     0.1204
Log likelihood = -980.32215         Pseudo R2      =     0.0012

```

| target_clavien | Coef.    | Std. Err. | z    | P> z  | [95% Conf. Interval] |          |
|----------------|----------|-----------|------|-------|----------------------|----------|
| preop_bmi      | .0231354 | .014889   | 1.55 | 0.120 | -.0060464            | .0523172 |
| /cut1          | .0030112 | .4037516  |      |       | -.7883274            | .7943498 |
| /cut2          | .21995   | .4038279  |      |       | -.5715381            | 1.011438 |
| /cut3          | .573616  | .4047101  |      |       | -.2196012            | 1.366833 |
| /cut4          | 2.277297 | .4164862  |      |       | 1.460999             | 3.093595 |
| /cut5          | 2.786414 | .4239976  |      |       | 1.955394             | 3.617434 |
| /cut6          | 3.365793 | .437382   |      |       | 2.50854              | 4.223046 |
| /cut7          | 4.377236 | .4856056  |      |       | 3.425467             | 5.329006 |

```
. ologit target_clavien preop_ecog
```

```

Iteration 0:  log likelihood = -981.52826
Iteration 1:  log likelihood = -981.42379
Iteration 2:  log likelihood = -981.42379

```

```

Ordered logistic regression          Number of obs   =      611
                                   LR chi2(1)        =       0.21
                                   Prob > chi2       =     0.6476
Log likelihood = -981.42379         Pseudo R2      =     0.0001

```

| target_clavien | Coef.     | Std. Err. | z    | P> z  | [95% Conf. Interval] |           |
|----------------|-----------|-----------|------|-------|----------------------|-----------|
| preop_ecog     | .0484904  | .1060566  | 0.46 | 0.648 | -.1593766            | .2563575  |
| /cut1          | -.5848881 | .1018574  |      |       | -.784525             | -.3852512 |
| /cut2          | -.3686078 | .1001168  |      |       | -.5648331            | -.1723824 |
| /cut3          | -.016489  | .0990021  |      |       | -.2105295            | .1775515  |
| /cut4          | 1.681498  | .1244086  |      |       | 1.437662             | 1.925335  |
| /cut5          | 2.189207  | .144894   |      |       | 1.90522              | 2.473194  |
| /cut6          | 2.767822  | .1791109  |      |       | 2.416771             | 3.118873  |
| /cut7          | 3.779259  | .2765768  |      |       | 3.237178             | 4.321339  |

```
. ologit target_clavien preop_tstage
```

```

Iteration 0:  log likelihood = -981.52826
Iteration 1:  log likelihood = -981.50748
Iteration 2:  log likelihood = -981.50748

```

```

Ordered logistic regression          Number of obs   =      611
                                   LR chi2(1)        =       0.04
                                   Prob > chi2       =     0.8384
Log likelihood = -981.50748         Pseudo R2      =     0.0000

```

| target_clavien | Coef.     | Std. Err. | z     | P> z  | [95% Conf. Interval] |          |
|----------------|-----------|-----------|-------|-------|----------------------|----------|
| preop_tstage   | -.026637  | .1305891  | -0.20 | 0.838 | -.2825869            | .229313  |
| /cut1          | -.6852817 | .3749902  |       |       | -1.420249            | .0496854 |
| /cut2          | -.4690693 | .3744726  |       |       | -1.203022            | .2648835 |
| /cut3          | -.1169521 | .3735792  |       |       | -.8491538            | .6152496 |
| /cut4          | 1.581528  | .377957   |       |       | .840746              | 2.32231  |
| /cut5          | 2.089374  | .3851371  |       |       | 1.334519             | 2.844229 |
| /cut6          | 2.667     | .3998918  |       |       | 1.884026             | 3.451573 |
| /cut7          | 3.678775  | .4526155  |       |       | 2.791665             | 4.565885 |

```
. ologit target_clavien preop_neoadj
```

```

Iteration 0:  log likelihood = -981.52826
Iteration 1:  log likelihood = -981.06367
Iteration 2:  log likelihood = -981.06364

```

```

Ordered logistic regression      Number of obs   =      611
                                LR chi2(1)       =      0.93
                                Prob > chi2          =      0.3351
Log likelihood = -981.06364     Pseudo R2      =      0.0005

```

| target_clavien | Coef.     | Std. Err. | z     | P> z  | [95% Conf. Interval] |
|----------------|-----------|-----------|-------|-------|----------------------|
| preop_neoadj   | -.0922078 | .0956946  | -0.96 | 0.335 | -.2797657 .0953501   |
| /cut1          | -.7473949 | .1653332  |       |       | -1.071442 -.4233479  |
| /cut2          | -.5308846 | .1638933  |       |       | -.8521097 -.2096596  |
| /cut3          | -.1783423 | .1625442  |       |       | -.496923 .1402385    |
| /cut4          | 1.521051  | .1770817  |       |       | 1.173977 1.868125    |
| /cut5          | 2.028874  | .1920458  |       |       | 1.652471 2.405276    |
| /cut6          | 2.607534  | .2188789  |       |       | 2.17854 3.036529     |
| /cut7          | 3.619168  | .3034457  |       |       | 3.024425 4.21391     |

```
. ologit target_clavien preop_asa
```

```

Iteration 0: log likelihood = -981.52826
Iteration 1: log likelihood = -981.51666
Iteration 2: log likelihood = -981.51666

```

```

Ordered logistic regression      Number of obs   =      611
                                LR chi2(1)       =      0.02
                                Prob > chi2          =      0.8789
Log likelihood = -981.51666     Pseudo R2      =      0.0000

```

| target_clavien | Coef.     | Std. Err. | z     | P> z  | [95% Conf. Interval] |
|----------------|-----------|-----------|-------|-------|----------------------|
| preop_asa      | -.0157401 | .1033243  | -0.15 | 0.879 | -.2182519 .1867718   |
| /cut1          | -.6308719 | .1567989  |       |       | -.938192 -.3235517   |
| /cut2          | -.4146385 | .155474   |       |       | -.7193619 -.1099151  |
| /cut3          | -.0626595 | .1547901  |       |       | -.3660426 .2407235   |
| /cut4          | 1.63515   | .1721419  |       |       | 1.297758 1.972542    |
| /cut5          | 2.142996  | .1874863  |       |       | 1.775529 2.510462    |
| /cut6          | 2.721565  | .2149934  |       |       | 2.300186 3.142945    |
| /cut7          | 3.732672  | .3010431  |       |       | 3.142639 4.322706    |

```
. ologit target_clavien preop_weightloss_bin
```

```

Iteration 0: log likelihood = -981.52826
Iteration 1: log likelihood = -981.24008
Iteration 2: log likelihood = -981.24007

```

```

Ordered logistic regression      Number of obs   =      611
                                LR chi2(1)       =      0.58
                                Prob > chi2          =      0.4477
Log likelihood = -981.24007     Pseudo R2      =      0.0003

```

| target_clavien       | Coef.     | Std. Err. | z     | P> z  | [95% Conf. Interval] |
|----------------------|-----------|-----------|-------|-------|----------------------|
| preop_weightloss_bin | -.1319197 | .1738759  | -0.76 | 0.448 | -.4727102 .2088708   |
| /cut1                | -.6423225 | .0944462  |       |       | -.8274336 -.4572114  |
| /cut2                | -.4259735 | .0923567  |       |       | -.6069893 -.2449577  |
| /cut3                | -.0734346 | .0906105  |       |       | -.2510279 .1041586   |
| /cut4                | 1.626328  | .116509   |       |       | 1.397975 1.854682    |
| /cut5                | 2.134391  | .1381718  |       |       | 1.863579 2.405203    |
| /cut6                | 2.713235  | .173589   |       |       | 2.373007 3.053463    |
| /cut7                | 3.724302  | .2728953  |       |       | 3.189437 4.259166    |

```
. ologit target_clavien preop_fev1_bin
```

```

Iteration 0: log likelihood = -981.52826
Iteration 1: log likelihood = -980.5515
Iteration 2: log likelihood = -980.55133
Iteration 3: log likelihood = -980.55133

```

```

Ordered logistic regression      Number of obs   =      611
                                LR chi2(1)       =      1.95
                                Prob > chi2          =      0.1622
Log likelihood = -980.55133     Pseudo R2      =      0.0010

```

| target_clavien | Coef.     | Std. Err. | z    | P> z  | [95% Conf. Interval] |
|----------------|-----------|-----------|------|-------|----------------------|
| preop_fev1_bin | .2468209  | .1765836  | 1.40 | 0.162 | -.0992766 .5929184   |
| /cut1          | -.5568789 | .0930141  |      |       | -.7391833 -.3745745  |
| /cut2          | -.3402201 | .0911587  |      |       | -.5188879 -.1615522  |
| /cut3          | .011778   | .0898081  |      |       | -.1642427 .1877987   |
| /cut4          | 1.711715  | .117837   |      |       | 1.480759 1.942672    |
| /cut5          | 2.221344  | .1398448  |      |       | 1.947253 2.495435    |
| /cut6          | 2.801263  | .1752887  |      |       | 2.457703 3.144822    |
| /cut7          | 3.812918  | .2740493  |      |       | 3.275791 4.350045    |

```
. ologit target_clavien preop_fev1_tot
```

```

Iteration 0: log likelihood = -981.52826
Iteration 1: log likelihood = -979.46657
Iteration 2: log likelihood = -979.46574

```

Iteration 3: log likelihood = -979.46574

Ordered logistic regression                      Number of obs        =        611  
LR chi2(1)                                        =        4.13  
Prob > chi2                                      =        0.0423  
Log likelihood = -979.46574                      Pseudo R2            =        0.0021

| target_clavien | Coef.     | Std. Err. | z     | P> z  | [95% Conf. Interval]   |
|----------------|-----------|-----------|-------|-------|------------------------|
| preop_fev1_tot | -.1886035 | .0932769  | -2.02 | 0.043 | -.3714229   - .0057842 |
| /cut1          | -1.188106 | .2980295  |       |       | -1.772233   - .6039789 |
| /cut2          | -.9703782 | .2965848  |       |       | -1.551674   - .3890826 |
| /cut3          | -.618018  | .2957912  |       |       | -1.197758   - .0382779 |
| /cut4          | 1.081806  | .3026641  |       |       | .4885953   1.675017    |
| /cut5          | 1.591114  | .3109039  |       |       | .9817534   2.200474    |
| /cut6          | 2.171532  | .3273603  |       |       | 1.529918   2.813147    |
| /cut7          | 3.184538  | .3885131  |       |       | 2.423067   3.94601     |

. ologit target\_clavien preop\_vc\_bin

Iteration 0: log likelihood = -981.52826  
Iteration 1: log likelihood = -981.19362  
Iteration 2: log likelihood = -981.1936

Ordered logistic regression                      Number of obs        =        611  
LR chi2(1)                                        =        0.67  
Prob > chi2                                      =        0.4133  
Log likelihood = -981.1936                      Pseudo R2            =        0.0003

| target_clavien | Coef.     | Std. Err. | z    | P> z  | [95% Conf. Interval]  |
|----------------|-----------|-----------|------|-------|-----------------------|
| preop_vc_bin   | .1528855  | .1868424  | 0.82 | 0.413 | -.2133189   .5190898  |
| /cut1          | -.5817172 | .0918089  |      |       | -.7616593   -.4017751 |
| /cut2          | -.3653163 | .0898696  |      |       | -.5414576   -.1891751 |
| /cut3          | -.0136766 | .0882937  |      |       | -.1867291   .159376   |
| /cut4          | 1.684506  | .1160864  |      |       | 1.456981   1.912031   |
| /cut5          | 2.193376  | .1382898  |      |       | 1.922333   2.464419   |
| /cut6          | 2.772504  | .1739368  |      |       | 2.431594   3.113414   |
| /cut7          | 3.783648  | .2731155  |      |       | 3.248352   4.318945   |

. ologit target\_clavien preop\_vc\_tot

Iteration 0: log likelihood = -981.52826  
Iteration 1: log likelihood = -979.49341  
Iteration 2: log likelihood = -979.49249  
Iteration 3: log likelihood = -979.49249

Ordered logistic regression                      Number of obs        =        611  
LR chi2(1)                                        =        4.07  
Prob > chi2                                      =        0.0436  
Log likelihood = -979.49249                      Pseudo R2            =        0.0021

| target_clavien | Coef.     | Std. Err. | z     | P> z  | [95% Conf. Interval]  |
|----------------|-----------|-----------|-------|-------|-----------------------|
| preop_vc_tot   | -.158622  | .0789692  | -2.01 | 0.045 | -.3133988   -.0038453 |
| /cut1          | -1.230946 | .3203771  |       |       | -1.858873   -.6030182 |
| /cut2          | -1.013086 | .3188979  |       |       | -1.638114   -.3880573 |
| /cut3          | -.6602034 | .3178733  |       |       | -1.283224   -.0371832 |
| /cut4          | 1.039715  | .3239606  |       |       | .404764   1.674666    |
| /cut5          | 1.548533  | .3317715  |       |       | .898273   2.198793    |
| /cut6          | 2.129057  | .3470875  |       |       | 1.448778   2.809336   |
| /cut7          | 3.142086  | .4051863  |       |       | 2.347936   3.936237   |

. ologit target\_clavien psm\_robot

Iteration 0: log likelihood = -981.52826  
Iteration 1: log likelihood = -979.41838  
Iteration 2: log likelihood = -979.41765  
Iteration 3: log likelihood = -979.41765

Ordered logistic regression                      Number of obs        =        611  
LR chi2(1)                                        =        4.22  
Prob > chi2                                      =        0.0399  
Log likelihood = -979.41765                      Pseudo R2            =        0.0022

| target_clavien | Coef.     | Std. Err. | z     | P> z  | [95% Conf. Interval]  |
|----------------|-----------|-----------|-------|-------|-----------------------|
| psm_robot      | -.4687046 | .229703   | -2.04 | 0.041 | -.9189143   -.0184949 |
| /cut1          | -.6694188 | .0896567  |       |       | -.8451427   -.493695  |
| /cut2          | -.4517284 | .0872717  |       |       | -.6227778   -.2806791 |
| /cut3          | -.0979531 | .085441   |       |       | -.2654144   .0695081  |
| /cut4          | 1.605104  | .1127251  |       |       | 1.384167   1.826041   |
| /cut5          | 2.113214  | .1350485  |       |       | 1.848524   2.377904   |
| /cut6          | 2.692443  | .1711465  |       |       | 2.357002   3.027884   |
| /cut7          | 3.70471   | .2712925  |       |       | 3.172987   4.236434   |

. ologit target\_clavien preop\_diag preop\_age preop\_sex preop\_smoke preop\_alcohol preop\_khk preop\_ahf preop\_vhf preop\_mi preop\_revasc preop\_pavk preop\_copd preop\_liver preop\_crea\_t

```

> ot preop_gfr_tot preop_quick_tot preop_albumin_tot preop_bilirubin_tot preop_platelet_bin preop_platelet_tot
preop_leuko_bin preop_leuko_tot preop_diabetes preop_weight preop_he
> ight preop_bmi preop_ecog preop_tstage preop_neoadj preop_asa preop_weightloss_bin preop_fev1_bin preop_fev1_tot
preop_vc_bin preop_vc_tot psm_robot

```

```

Iteration 0: log likelihood = -981.52826
Iteration 1: log likelihood = -958.55393
Iteration 2: log likelihood = -958.44063
Iteration 3: log likelihood = -958.44059

```

```

Ordered logistic regression      Number of obs      =      611
                                LR chi2(36)            =      46.18
                                Prob > chi2            =      0.1192
                                Pseudo R2              =      0.0235
Log likelihood = -958.44059

```

| target_clavien       | Coef.     | Std. Err. | z     | P> z  | [95% Conf. Interval] |          |
|----------------------|-----------|-----------|-------|-------|----------------------|----------|
| preop_diag           | .2958104  | .2107815  | 1.40  | 0.160 | -.1173137            | .7089345 |
| preop_age            | .0240988  | .013692   | 1.76  | 0.078 | -.002737             | .0509345 |
| preop_sex            | .3190734  | .3189166  | 1.00  | 0.317 | -.3059916            | .9441384 |
| preop_smoke          | .0721571  | .117763   | 0.61  | 0.540 | -.1586542            | .3029683 |
| preop_alcohol        | -.1200487 | .0839121  | -1.43 | 0.153 | -.2845134            | .0444159 |
| preop_khk            | .4072216  | .3313026  | 1.23  | 0.219 | -.2421195            | 1.056563 |
| preop_aht            | -.1012486 | .1674146  | -0.60 | 0.545 | -.4293753            | .226878  |
| preop_vhf            | .278302   | .303634   | 0.92  | 0.359 | -.3168097            | .8734137 |
| preop_mi             | .0430775  | .3786773  | 0.11  | 0.909 | -.6991165            | .7852714 |
| preop_revasc         | -.5662181 | .4275882  | -1.32 | 0.185 | -1.404276            | .2718395 |
| preop_pavk           | .0043689  | .3989792  | 0.01  | 0.991 | -.7776159            | .7863537 |
| preop_copd           | .0532825  | .2323899  | 0.23  | 0.819 | -.4021934            | .5087584 |
| preop_liver          | -.2208616 | .3403901  | -0.65 | 0.516 | -.8880139            | .4462907 |
| preop_crea_tot       | .908322   | .7982525  | 1.14  | 0.255 | -.6562242            | 2.472868 |
| preop_gfr_tot        | .0034878  | .0101603  | 0.34  | 0.731 | -.016426             | .0234016 |
| preop_quick_tot      | .0022171  | .0054449  | 0.41  | 0.684 | -.0084547            | .012889  |
| preop_albumin_tot    | .0465906  | .0196391  | 2.37  | 0.018 | .0080988             | .0850824 |
| preop_bilirubin_tot  | -.0080342 | .3634425  | -0.02 | 0.982 | -.7203684            | .7043    |
| preop_platelet_bin   | -.1303041 | .3266456  | -0.40 | 0.690 | -.7705177            | .5099096 |
| preop_platelet_tot   | -.0016849 | .0010025  | -1.68 | 0.093 | -.0036498            | .0002799 |
| preop_leuko_bin      | -.2722625 | .2575382  | -1.06 | 0.290 | -.777028             | .2325031 |
| preop_leuko_tot      | .0660022  | .0351129  | 1.88  | 0.060 | -.0028178            | .1348223 |
| preop_diabetes       | .2074778  | .2453426  | 0.85  | 0.398 | -.2733849            | .6883404 |
| preop_weight         | .0148662  | .0489453  | 0.30  | 0.761 | -.0810648            | .1107972 |
| preop_height         | -.9418378 | 4.894166  | -0.19 | 0.847 | -10.53423            | 8.650551 |
| preop_bmi            | -.0253877 | .1525284  | -0.17 | 0.868 | -.3243379            | .2735626 |
| preop_ecog           | -.0472536 | .117322   | -0.40 | 0.687 | -.2772006            | .1826933 |
| preop_tstage         | .1196907  | .1527467  | 0.78  | 0.433 | -.1796873            | .4190686 |
| preop_neoadj         | -.0519718 | .1213627  | -0.43 | 0.668 | -.2898383            | .1858947 |
| preop_asa            | -.0173371 | .1176142  | -0.15 | 0.883 | -.2478568            | .2131825 |
| preop_weightloss_bin | -.0441396 | .1882343  | -0.23 | 0.815 | -.4130722            | .3247929 |
| preop_fev1_bin       | .4148451  | .2705546  | 1.53  | 0.125 | -.115432             | .9451223 |
| preop_fev1_tot       | .0826848  | .2108457  | 0.39  | 0.695 | -.3305651            | .4959347 |
| preop_vc_bin         | -.2448852 | .2612089  | -0.94 | 0.348 | -.7568454            | .2670749 |
| preop_vc_tot         | -.1000473 | .1767692  | -0.57 | 0.571 | -.4465084            | .2464139 |
| psm_robot            | -.4026424 | .2619737  | -1.54 | 0.124 | -.9161014            | .1108167 |
| /cut1                | 3.110269  | 8.995473  |       |       | -14.52053            | 20.74107 |
| /cut2                | 3.339449  | 8.995768  |       |       | -14.29193            | 20.97083 |
| /cut3                | 3.713643  | 8.996308  |       |       | -13.9188             | 21.34608 |
| /cut4                | 5.491483  | 8.99736   |       |       | -12.14302            | 23.12598 |
| /cut5                | 6.012208  | 8.996894  |       |       | -11.62138            | 23.6458  |
| /cut6                | 6.606966  | 8.997565  |       |       | -11.02794            | 24.24187 |
| /cut7                | 7.633713  | 9.000814  |       |       | -10.00756            | 25.27498 |
