# Supplementary material for: Robot-assisted minimally invasive esophagectomy (RAMIE) vs. hybrid minimally invasive esophagectomy: propensity score matched short-term outcome analysis of a European high-volume center
Source: PubMed Central journal article supplement (PMC9485091; doi:10.1007/s00464-022-09254-2), 2022-05-03
Supplement: 464_2022_9254_MOESM3_ESM.pdf [file 464_2022_9254_MOESM3_ESM.pdf]

. tabulate psm\_robot target\_ai , chi2

| psm_robot | target_ai |    | Total |
|-----------|-----------|----|-------|
|           | 0         | 1  |       |
| 0         | 56        | 15 | 71    |
| 1         | 65        | 6  | 71    |
| Total     | 121       | 21 | 142   |

Pearson chi2(1) = 4.5266 Pr = 0.033

. tabulate psm\_robot target\_conversion , chi2

| psm_robot | target_conversion |   | Total |
|-----------|-------------------|---|-------|
|           | 0                 | 1 |       |
| 0         | 71                | 0 | 71    |
| 1         | 70                | 1 | 71    |
| Total     | 141               | 1 | 142   |

Pearson chi2(1) = 1.0071 Pr = 0.316

. tabulate psm\_robot target\_taa , chi2

| psm_robot | target_taa |    | Total |
|-----------|------------|----|-------|
|           | 0          | 1  |       |
| 0         | 60         | 11 | 71    |
| 1         | 64         | 7  | 71    |
| Total     | 124        | 18 | 142   |

Pearson chi2(1) = 1.0179 Pr = 0.313

. tabulate psm\_robot target\_pneumonia , chi2

| psm_robot | target_pneumonia |    | Total |
|-----------|------------------|----|-------|
|           | 0                | 1  |       |
| 0         | 65               | 6  | 71    |
| 1         | 65               | 6  | 71    |
| Total     | 130              | 12 | 142   |

Pearson chi2(1) = 0.0000 Pr = 1.000

. tabulate psm\_robot target\_r\_status , chi2

| psm_robot | target_r_status |   | Total |
|-----------|-----------------|---|-------|
|           | 0               | 1 |       |
| 0         | 70              | 1 | 71    |
| 1         | 67              | 4 | 71    |
| Total     | 137             | 5 | 142   |

Pearson chi2(1) = 1.8657 Pr = 0.172

. ttest target\_icu\_days , by(psm\_robot)

Two-sample t test with equal variances

| Group    | Obs | Mean     | Std. Err. | Std. Dev. | [95% Conf. Interval] |          |
|----------|-----|----------|-----------|-----------|----------------------|----------|
| 0        | 71  | 5.605634 | .5742562  | 4.838769  | 4.460316             | 6.750952 |
| 1        | 71  | 3.197183 | .3413901  | 2.876604  | 2.516302             | 3.878064 |
| combined | 142 | 4.401408 | .3479552  | 4.146364  | 3.713525             | 5.089292 |
| diff     |     | 2.408451 | .6680699  |           | 1.087641             | 3.729261 |

diff = mean(0) - mean(1) t = 3.6051  
 Ho: diff = 0 degrees of freedom = 140

Ha: diff < 0 Ha: diff != 0 Ha: diff > 0  
 Pr(T < t) = 0.9998 Pr(|T| > |t|) = 0.0004 Pr(T > t) = 0.0002

. ttest op\_duration , by(psm\_robot)

Two-sample t test with equal variances

| Group    | Obs | Mean     | Std. Err. | Std. Dev. | [95% Conf. Interval] |          |
|----------|-----|----------|-----------|-----------|----------------------|----------|
| 0        | 71  | 0        | 0         | 0         | 0                    | 0        |
| 1        | 71  | 380.6338 | 7.647023  | 64.43496  | 365.3823             | 395.8853 |
| combined | 142 | 190.3169 | 16.47418  | 196.3125  | 157.7486             | 222.8852 |

```
-----+-----
diff |          -380.6338    7.647023          -395.7524   -365.5152
-----+-----
```

```
diff = mean(0) - mean(1)          t = -49.7754
Ho: diff = 0                      degrees of freedom = 140
```

```
Ha: diff < 0                      Ha: diff != 0                      Ha: diff > 0
Pr(T < t) = 0.0000                Pr(|T| > |t|) = 0.0000                Pr(T > t) = 1.0000
```

```
. ttest op_elv , by(psm_robot)
```

```
Two-sample t test with equal variances
```

```
-----+-----
Group |      Obs      Mean   Std. Err.   Std. Dev.   [95% Conf. Interval]
-----+-----
0 |      71   135.4676   2.031476   17.11752   131.4159   139.5192
1 |      71   190.1181   4.596151   38.72785   180.9514   199.2848
-----+-----
```

```
combined |      142   162.7928   3.400535   40.52205   156.0702   169.5155
-----+-----
diff |          -54.65054   5.025087          -64.5854   -44.71567
-----+-----
```

```
diff = mean(0) - mean(1)          t = -10.8755
Ho: diff = 0                      degrees of freedom = 140
```

```
Ha: diff < 0                      Ha: diff != 0                      Ha: diff > 0
Pr(T < t) = 0.0000                Pr(|T| > |t|) = 0.0000                Pr(T > t) = 1.0000
```

```
. ttest target_los , by(psm_robot)
```

```
Two-sample t test with equal variances
```

```
-----+-----
Group |      Obs      Mean   Std. Err.   Std. Dev.   [95% Conf. Interval]
-----+-----
0 |      71   19.64124   1.121252   9.447833   17.40497   21.87751
1 |      71   16.15493   .9898169   8.340346   14.1808   18.12906
-----+-----
```

```
combined |      142   17.89808   .7594865   9.050326   16.39663   19.39954
-----+-----
diff |          3.48631    1.495641          .5293468    6.443273
-----+-----
```

```
diff = mean(0) - mean(1)          t = 2.3310
Ho: diff = 0                      degrees of freedom = 140
```

```
Ha: diff < 0                      Ha: diff != 0                      Ha: diff > 0
Pr(T < t) = 0.9894                Pr(|T| > |t|) = 0.0212                Pr(T > t) = 0.0106
```

```
. ttest target_ebl , by(psm_robot)
```

```
Two-sample t test with equal variances
```

```
-----+-----
Group |      Obs      Mean   Std. Err.   Std. Dev.   [95% Conf. Interval]
-----+-----
0 |      71          0          0          0          0          0
1 |      71   229.6335   11.80055   99.43318   206.0981   253.169
-----+-----
```

```
combined |      142   114.8168   11.31645   134.851   92.44492   137.1886
-----+-----
diff |          -229.6335   11.80055          -252.9639   -206.3032
-----+-----
```

```
diff = mean(0) - mean(1)          t = -19.4596
Ho: diff = 0                      degrees of freedom = 140
```

```
Ha: diff < 0                      Ha: diff != 0                      Ha: diff > 0
Pr(T < t) = 0.0000                Pr(|T| > |t|) = 0.0000                Pr(T > t) = 1.0000
```

```
. ttest target_lymphnode_positive , by(psm_robot)
```

```
Two-sample t test with equal variances
```

```
-----+-----
Group |      Obs      Mean   Std. Err.   Std. Dev.   [95% Conf. Interval]
-----+-----
0 |      71   1.535211   .3863001   3.255022   .76476   2.305663
1 |      71   2.309859   .7440148   6.26918   .8259685   3.79375
-----+-----
```

```
combined |      142   1.922535   .4189443   4.992298   1.094311   2.750759
-----+-----
diff |          -.7746479   .8383232          -2.432058   .882762
-----+-----
```

```
diff = mean(0) - mean(1)          t = -0.9240
Ho: diff = 0                      degrees of freedom = 140
```

```
Ha: diff < 0                      Ha: diff != 0                      Ha: diff > 0
Pr(T < t) = 0.1785                Pr(|T| > |t|) = 0.3571                Pr(T > t) = 0.8215
```

```
. ttest target_lymphnode_yield , by(psm_robot)
```

```
Two-sample t test with equal variances
```

```
-----+-----
Group |      Obs      Mean   Std. Err.   Std. Dev.   [95% Conf. Interval]
-----+-----
0 |      71   32.19718   1.030251   8.681046   30.14241   34.25195
1 |      71   36.8169   1.70268   14.34704   33.42101   40.21279
-----+-----
```

```
combined |      142   34.50704   1.010421   12.04056   32.50951   36.50458
-----+-----
diff |          -4.619718   1.990109          -8.554271   -.6851653
-----+-----
```

```
diff = mean(0) - mean(1)          t = -2.3213
Ho: diff = 0                      degrees of freedom = 140
```

Ha: diff < 0                      Ha: diff != 0                      Ha: diff > 0  
 Pr(T < t) = 0.0109                  Pr(|T| > |t|) = 0.0217                  Pr(T > t) = 0.9891

. ranksum target\_clavien , by(psm\_robot)

Two-sample Wilcoxon rank-sum (Mann-Whitney) test

| psm_robot | obs | rank sum | expected |
|-----------|-----|----------|----------|
| 0         | 71  | 5641.5   | 5076.5   |
| 1         | 71  | 4511.5   | 5076.5   |
| combined  | 142 | 10153    | 10153    |

unadjusted variance    60071.92  
 adjustment for ties    -4927.95  
 -----  
 adjusted variance      55143.96

Ho: target~en(psm\_ro~t==0) = target~en(psm\_ro~t==1)  
     z = 2.406  
     Prob > |z| = 0.0161

.
